# Supplementary material for: Elimination of transmission of onchocerciasis (river blindness) with long-term ivermectin mass drug administration with or without vector control in sub-Saharan Africa: a systematic review and meta-analysis
Source: PubMed Central journal article supplement (PMC11009120; doi:10.1016/s2214-109x(24)00043-3), 2024-03-11
Supplement: mmc5.pdf [file mmc5.pdf]

# THE LANCET

## Global Health

### Supplementary appendix 5

This appendix formed part of the original submission and has been peer reviewed. We post it as supplied by the authors.

Supplement to: Nyamai Mutono N, Basáñez M-G, James A, et al. Elimination of transmission of onchocerciasis (river blindness) with long-term ivermectin mass drug administration with or without vector control in sub-Saharan Africa: a systematic review and meta-analysis. *Lancet Glob Health* 2024; published online March 11. [https://doi.org/10.1016/S2214-109X\(24\)00043-3](https://doi.org/10.1016/S2214-109X(24)00043-3).

## Supplementary appendix

This appendix forms part of the original submission and will be peer reviewed.

Supplement to:

### **Elimination of transmission of onchocerciasis (river blindness) with long-term ivermectin mass drug administration with or without vector control in sub-Saharan Africa: a systematic review and meta-analysis**

Nyamai Mutono PhD<sup>1,2\*</sup>, Prof. Maria-Gloria Basáñez PhD<sup>3\*</sup>, Ananthu James PhD<sup>4</sup>, Wilma A. Stolk PhD<sup>4</sup>, Anita Makori BSc<sup>1,2</sup>, Teresia Njoki Kimani MSc<sup>1,2,5</sup>, Prof. T. Déirdre Hollingsworth PhD<sup>6</sup>, Andreia Vasconcelos PhD<sup>6</sup>, Matthew A. Dixon PhD<sup>3</sup>, Prof. Sake J. de Vlas PhD<sup>4†</sup>, Prof. S.M. Thumbi PhD<sup>1,2,7†</sup>

<sup>1</sup> Centre for Epidemiological Modelling and Analysis, University of Nairobi, Nairobi, Kenya

<sup>2</sup> Paul G Allen School for Global Health, Washington State University, WA, USA

<sup>3</sup> MRC Centre for Global Infectious Disease Analysis (MRC GIDA) and London Centre for Neglected Tropical Disease Research (LCNTDR), School of Public Health, Department of Infectious Disease Epidemiology, Imperial College London, London, UK

<sup>4</sup> Department of Public Health, Erasmus MC, University Medical Center Rotterdam, Rotterdam, The Netherlands

<sup>5</sup> Ministry of Health Kenya, Kiambu County, Kenya

<sup>6</sup> Big Data Institute, University of Oxford, Oxford, UK

<sup>7</sup> Institute of Immunology and Infection Research, University of Edinburgh, Edinburgh, UK

\* Co-first authors

† Contributed equally

Correspondence to: Mutono Nyamai, Centre for Epidemiological Modelling and Analysis, University of Nairobi, P.O Box 30197-00100, Nairobi Kenya

[mutono.nyamai@uonbi.ac.ke](mailto:mutono.nyamai@uonbi.ac.ke)

## Search strategy used in each database

Onchocerciasis, Onchocerca volvulus  
 AND  
 ivermectin, mectizan  
 AND  
 mass drug administration, community directed treatment  
 AND  
 prevalence, microfilarial, microfilariae, microfilaria, endemicity, biting rate, microfilarial load, Ov16,  
 elimin [ation] [ated], interruption, L3

**Table S1: Detailed search strategy and records retrieved from each database**

| Database searched                                            | Platform                                                                              | Search strategy                                                                                                                                                                                                                                                                                                                                                                                                                                                                                                                                                                                                                                                                                                 | Records | Records after duplicates removed |
|--------------------------------------------------------------|---------------------------------------------------------------------------------------|-----------------------------------------------------------------------------------------------------------------------------------------------------------------------------------------------------------------------------------------------------------------------------------------------------------------------------------------------------------------------------------------------------------------------------------------------------------------------------------------------------------------------------------------------------------------------------------------------------------------------------------------------------------------------------------------------------------------|---------|----------------------------------|
| Embase                                                       | Embase.com                                                                            | ('onchocerciasis'/exp OR 'Onchocerca volvulus'/de OR (Onchocerc* OR onchodermat* OR river-blindness*):ab,ti,kw) AND ('ivermectin'/de OR (ivermectin* OR mectizan*):ab,ti,kw) AND ('mass drug administration'/de OR 'group therapy'/de OR 'epidemiology'/de OR 'mass immunization'/de OR 'parasite transmission'/de OR (mass OR ((communit*) NEAR/3 (administrat* OR treatment* OR immunization* OR immunisation* OR distribution* OR therap* OR chemotherap* OR vaccination*)) OR epidemiolog* OR ((parasite* OR elimination) NEAR/3 (transmission* OR public-health-problem*)) OR EoT OR EPHP):ab,ti,kw) NOT (([Conference Abstract]/lim OR [Conference Review]/lim)                                           | 1099    | 1077                             |
| MEDLINE                                                      | Ovid                                                                                  | (exp Onchocerciasis/ OR Onchocerca volvulus/ OR (Onchocerc* OR onchodermat* OR river-blindness*):ab,ti,kf.) AND (Ivermectin/ OR (ivermectin* OR mectizan*):ab,ti,kf.) AND (Mass Drug Administration/ OR Epidemiology/ OR exp Onchocerciasis/ep OR Onchocerca volvulus/ep OR Mass Vaccination/ OR Disease Transmission, Infectious/ OR (mass OR ((communit*) ADJ3 (administrat* OR treatment* OR immunization* OR immunisation* OR distribution* OR therap* OR chemotherap* OR vaccination*)) OR epidemiolog* OR ((parasite* OR elimination) ADJ3 (transmission* OR public-health-problem*)) OR EoT OR EPHP):ab,ti,kf.) NOT ((news OR congres* OR abstract* OR book* OR chapter* OR dissertation abstract*):pt.) | 922     | 182                              |
| Web of Science*<br>Core<br>Collection                        | Web of Knowledge                                                                      | TS=(((Onchocerc* OR onchodermat* OR river-blindness*)) AND ((ivermectin* OR mectizan*)) AND ((mass OR ((communit*) NEAR/2 (administrat* OR treatment* OR immunization* OR immunisation* OR distribution* OR therap* OR chemotherap* OR vaccination*)) OR epidemiolog* OR ((parasite* OR elimination) NEAR/2 (transmission* OR public-health-problem*)) OR EoT OR EPHP))) AND DT=(Article OR Review OR Letter OR Early Access)                                                                                                                                                                                                                                                                                   | 840     | 181                              |
| Cochrane<br>Central<br>Register of<br>Controlled<br>Trials** | Wiley                                                                                 | ((Onchocerc* OR onchodermat* OR river-blindness*):ab,ti) AND ((ivermectin* OR mectizan*):ab,ti) AND ((mass OR ((communit*) NEAR/3 (administrat* OR treatment* OR immunization* OR immunisation* OR distribution* OR therap* OR chemotherap* OR vaccination*)) OR epidemiolog* OR ((parasite* OR elimination) NEAR/3 (transmission* OR public-health-problem*)) OR EoT OR EPHP):ab,ti) NOT "conference abstract":pt                                                                                                                                                                                                                                                                                              | 37      | 1                                |
| African<br>Index<br>Medicus<br>(WHO)                         | <a href="https://www.globalindexmedicus.net/">https://www.globalindexmedicus.net/</a> | TW:((Onchocerc* OR onchodermat* OR river-blindness*) AND (ivermectin* OR mectizan*) AND (mass OR community OR epidemiolog* OR EoT OR EPHP))                                                                                                                                                                                                                                                                                                                                                                                                                                                                                                                                                                     | 24      | 16                               |

|                                 |                                                                                                                                                                                                                                                                                                                                               |     |             |
|---------------------------------|-----------------------------------------------------------------------------------------------------------------------------------------------------------------------------------------------------------------------------------------------------------------------------------------------------------------------------------------------|-----|-------------|
| Google Scholar (200 top ranked) | onchocerciasis "river-blindness" ivermectin mectizan "mass community administration treatment immunization immunisation distribution therapy chemotherapy vaccination" onchocerciasis "river-blindness" ivermectin mectizan 'mass community administration treatment immunization immunisation distribution therapy chemotherapy vaccination' | 220 | 68          |
| <b>Total</b>                    |                                                                                                                                                                                                                                                                                                                                               |     | <b>1525</b> |

\*Science Citation Index Expanded (1975–present); Social Sciences Citation Index (1975–present); Arts & Humanities Citation Index (1975–present); Conference Proceedings Citation Index–Science (1990–present); Conference Proceedings Citation Index–Social Science & Humanities (1990–present); Emerging Sources Citation Index (2005–present).

\*\* Manually deleted abstracts from trial registries

**Table S2: Criteria used for abstract screening**

| Criterion  | Guidance                                                                                                                                                      | Outcome                           |
|------------|---------------------------------------------------------------------------------------------------------------------------------------------------------------|-----------------------------------|
| Study foci | Does the Title/Abstract exclusively target foci or endemic areas outside the African region?                                                                  | If yes, exclude<br>If no, include |
| Treatment  | Does the Title/Abstract mention use of ivermectin or Mectizan® as a therapeutic treatment for onchocerciasis for at least 10 years?                           | If yes, include<br>If no, exclude |
| Endemicity | Does the Title/Abstract mention endemicity either through microfilarial prevalence, palpable nodule prevalence or microfilarial load in the study population? | If yes, include<br>If no, exclude |

**Table S3: Variables extracted**

| Data extracted                            | Description                                                                                                                                                                                                                                                                                                                                                                                                                           |
|-------------------------------------------|---------------------------------------------------------------------------------------------------------------------------------------------------------------------------------------------------------------------------------------------------------------------------------------------------------------------------------------------------------------------------------------------------------------------------------------|
| Authors and Year of publication           |                                                                                                                                                                                                                                                                                                                                                                                                                                       |
| Journal title and Article title           |                                                                                                                                                                                                                                                                                                                                                                                                                                       |
| Country of focus                          | Country or countries where the study took place                                                                                                                                                                                                                                                                                                                                                                                       |
| Subnational area                          | States, districts, foci or villages where the study was conducted                                                                                                                                                                                                                                                                                                                                                                     |
| Year data were collected                  | When the study was conducted                                                                                                                                                                                                                                                                                                                                                                                                          |
| Population sample size                    | Study population and sample size for each study foci                                                                                                                                                                                                                                                                                                                                                                                  |
| Ecological features                       | Savannah, forest, or forest-savannah mosaic                                                                                                                                                                                                                                                                                                                                                                                           |
| Vector details                            | <i>Simulium</i> species, baseline annual biting rate (no. bites/person/year) and annual transmission potential (no. L3 larvae/person/year)                                                                                                                                                                                                                                                                                            |
| Baseline (pre-intervention) endemicity    | Level of onchocerciasis endemicity at baseline (from hypo- to holoendemicity) according to microfilarial prevalence, onchocercal nodule prevalence, and/or community microfilarial load (CMFL)                                                                                                                                                                                                                                        |
| Vector control                            | Presence or absence of vector control; number of years of vector control; type of vector control (aerial or ground larviciding of vector breeding sites)                                                                                                                                                                                                                                                                              |
| Ivermectin MDA treatment                  | Number of years of ivermectin treatment in the study area; geographical coverage; therapeutic coverage of eligible population (if $\geq 80\%$ , record the number of years it has been above this level); treatment frequency (yearly or more frequently; if shift to biannual or quarterly, record the number of years of change in frequency); proportion of the population adhering or not to treatment; proportion never treated. |
| Microfilarial prevalence and CMFL         | Methods for collecting and incubating skin snips, detecting and enumerating microfilariae; calculation of microfilarial prevalence and CMFL, age groups and sample sizes                                                                                                                                                                                                                                                              |
| Nodule prevalence                         | Method for recording palpable nodules; age groups and sample sizes                                                                                                                                                                                                                                                                                                                                                                    |
| Diagnostic tests used in Stop-MDA surveys | Children samples, ages and sample size; method for IgG4 antibody testing (ELISA, RDT); blackfly samples, number of flies tested and method for recording fly infection/infectivity. Ov16 seroprevalence (with 95% CIs), fly infectivity rate (with 95% CIs)                                                                                                                                                                           |
| Co-endemicity                             | Record co-endemic infections ( <i>Loa loa</i> , <i>Wuchereria bancrofti</i> )                                                                                                                                                                                                                                                                                                                                                         |
| Other important data collected            | Record other clinical manifestations; duration of civil conflict; MDA interruption                                                                                                                                                                                                                                                                                                                                                    |



**Table S4: Quality assessment of the 75 studies using the STROBE and NIH checklists**

| Author and year of publication                | Does the study have a clearly stated objective? | Is there a clear study design? | Is there a description of the study location? | Are there dates of data collection? | Are there participant eligibility criteria clearly stated? | Have the vector species been identified? | Has the morbidity examination clearly been described? | Has the parasitological examination been clearly described? | Is there a discussion of study limitations? | Have sources of funding been mentioned? | Quality  |
|-----------------------------------------------|-------------------------------------------------|--------------------------------|-----------------------------------------------|-------------------------------------|------------------------------------------------------------|------------------------------------------|-------------------------------------------------------|-------------------------------------------------------------|---------------------------------------------|-----------------------------------------|----------|
| Abong et al., 2020 <sup>1</sup>               | Yes                                             | Yes                            | Yes                                           | Yes                                 | Yes                                                        | No                                       | Yes                                                   | Yes                                                         | Yes                                         | Yes                                     | High     |
| Anosike et al., 2007 <sup>2</sup>             | Yes                                             | Yes                            | Yes                                           | Yes                                 | Yes                                                        | No                                       | Yes                                                   | –                                                           | No                                          | No                                      | High     |
| Aza'ah et al., 2020 <sup>3</sup>              | Yes                                             | Yes                            | Yes                                           | Yes                                 | Yes                                                        | No                                       | Yes                                                   | –                                                           | No                                          | Yes                                     | High     |
| Bakajika et al., 2018 <sup>4</sup>            | Yes                                             | Yes                            | Yes                                           | Yes                                 | Yes                                                        | Yes                                      | Yes                                                   | Yes                                                         | No                                          | Yes                                     | High     |
| Biritwum et al., 2021 <sup>5</sup>            | Yes                                             | Yes                            | No                                            | Yes                                 | Yes                                                        | No                                       | Yes                                                   | Yes                                                         | No                                          | Yes                                     | High     |
| Borsboom et al., 2003 <sup>6</sup>            | Yes                                             | Yes                            | Yes                                           | Yes                                 | Yes                                                        | Yes                                      | No                                                    | Yes                                                         | No                                          | No                                      | High     |
| Diawara et al., 2009 <sup>7</sup>             | Yes                                             | Yes                            | Yes                                           | Yes                                 | Yes                                                        | Yes                                      | Yes                                                   | Yes                                                         | No                                          | Yes                                     | High     |
| Djune-Yemeli et al., 2022 <sup>8</sup>        | Yes                                             | Yes                            | Yes                                           | Yes                                 | Yes                                                        | No                                       | Yes                                                   | No                                                          | Yes                                         | Yes                                     | High     |
| Dolo et al., 2021 <sup>9</sup>                | Yes                                             | Yes                            | Yes                                           | Yes                                 | Yes                                                        | Yes                                      | Yes                                                   | –                                                           | No                                          | Yes                                     | High     |
| Evans et al., 2014 <sup>10</sup>              | Yes                                             | Yes                            | Yes                                           | Yes                                 | Yes                                                        | Yes                                      | Yes                                                   | Yes                                                         | Yes                                         | Yes                                     | High     |
| Forrer et al., 2021 <sup>11</sup>             | Yes                                             | Yes                            | Yes                                           | Yes                                 | Yes                                                        | No                                       | Yes                                                   | –                                                           | Yes                                         | Yes                                     | High     |
| Garms et al., 2015 <sup>12</sup>              | Yes                                             | Yes                            | Yes                                           | Yes                                 | No                                                         | Yes                                      | –                                                     | Yes                                                         | No                                          | Yes                                     | High     |
| Gebrezgabiher et al., 2020 <sup>13</sup>      | Yes                                             | Yes                            | Yes                                           | Yes                                 | Yes                                                        | No                                       | Yes                                                   | Yes                                                         | Yes                                         | Yes                                     | High     |
| Hendy et al., 2018 <sup>14</sup>              | Yes                                             | Yes                            | Yes                                           | Yes                                 | Yes                                                        | Yes                                      | –                                                     | Yes                                                         | Yes                                         | Yes                                     | High     |
| Hernández-González et al., 2016 <sup>15</sup> | Yes                                             | Yes                            | Yes                                           | Yes                                 | Yes                                                        | Yes                                      | Yes                                                   | Yes                                                         | Yes                                         | Yes                                     | High     |
| Herrador et al., 2018 <sup>16</sup>           | Yes                                             | Yes                            | Yes                                           | Yes                                 | Yes                                                        | Yes                                      | Yes                                                   | Yes                                                         | Yes                                         | Yes                                     | High     |
| Higazi et al., 2013 <sup>17</sup>             | Yes                                             | Yes                            | Yes                                           | Yes                                 | Yes                                                        | Yes                                      | Yes                                                   | Yes                                                         | No                                          | Yes                                     | High     |
| Johanns et al., 2022 <sup>18</sup>            | Yes                                             | Yes                            | Yes                                           | Yes                                 | Yes                                                        | Yes                                      | Yes                                                   | Yes                                                         | No                                          | Yes                                     | High     |
| Kamga et al., 2016 <sup>19</sup>              | Yes                                             | Yes                            | Yes                                           | Yes                                 | Yes                                                        | No                                       | Yes                                                   | No                                                          | No                                          | Yes                                     | Moderate |
| Kamga et al., 2017 <sup>20</sup>              | Yes                                             | Yes                            | Yes                                           | Yes                                 | Yes                                                        | No                                       | Yes                                                   | No                                                          | No                                          | Yes                                     | Moderate |
| Kamga et al., 2018 <sup>21</sup>              | Yes                                             | Yes                            | Yes                                           | Yes                                 | Yes                                                        | No                                       | No                                                    | –                                                           | Yes                                         | Yes                                     | High     |
| Katarbarwa et al., 2008 <sup>22</sup>         | Yes                                             | Yes                            | Yes                                           | Yes                                 | Yes                                                        | No                                       | Yes                                                   | Yes                                                         | No                                          | Yes                                     | High     |
| Katarbarwa et al., 2011 <sup>23</sup>         | Yes                                             | Yes                            | Yes                                           | Yes                                 | Yes                                                        | Yes                                      | Yes                                                   | Yes                                                         | No                                          | Yes                                     | High     |
| Katarbarwa et al., 2012 <sup>24</sup>         | Yes                                             | Yes                            | Yes                                           | Yes                                 | Yes                                                        | Yes                                      | Yes                                                   | Yes                                                         | No                                          | Yes                                     | High     |

|                                             |     |     |     |     |     |     |     |     |     |     |          |
|---------------------------------------------|-----|-----|-----|-----|-----|-----|-----|-----|-----|-----|----------|
| Katarbarwa et al., 2013a <sup>25</sup>      | Yes | Yes | Yes | Yes | Yes | Yes | Yes | Yes | No  | Yes | High     |
| Katarbarwa et al., 2013b <sup>26</sup>      | Yes | Yes | Yes | Yes | Yes | Yes | Yes | Yes | No  | No  | High     |
| Katarbarwa et al., 2014 <sup>27</sup>       | Yes | Yes | Yes | Yes | No  | Yes | Yes | –   | No  | Yes | High     |
| Katarbarwa et al., 2016 <sup>28</sup>       | Yes | Yes | Yes | Yes | Yes | Yes | Yes | No  | No  | No  | High     |
| Katarbarwa et al., 2020a <sup>29</sup>      | Yes | Yes | Yes | Yes | Yes | Yes | Yes | Yes | No  | Yes | High     |
| Katarbarwa et al., 2020b <sup>30</sup>      | Yes | Yes | Yes | Yes | Yes | Yes | Yes | Yes | No  | Yes | High     |
| Kogi & Bulus, 2008 <sup>31</sup>            | Yes | Yes | Yes | Yes | No  | No  | No  | No  | No  | No  | Moderate |
| Komlan et al., 2018 <sup>32</sup>           | Yes | Yes | Yes | No  | Yes | Yes | Yes | Yes | No  | Yes | High     |
| Koudou et al., 2018 <sup>33</sup>           | Yes | Yes | Yes | Yes | Yes | Yes | Yes | –   | Yes | Yes | High     |
| Lakwo et al., 2013 <sup>34</sup>            | Yes | Yes | Yes | Yes | Yes | Yes | Yes | –   | No  | Yes | High     |
| Lakwo et al., 2015 <sup>35</sup>            | Yes | Yes | Yes | Yes | Yes | Yes | Yes | –   | Yes | Yes | High     |
| Lakwo et al., 2017 <sup>36</sup>            | Yes | Yes | Yes | Yes | Yes | Yes | Yes | No  | No  | Yes | High     |
| Lakwo Luroni et al., 2017 <sup>37</sup>     | Yes | Yes | Yes | Yes | Yes | Yes | Yes | Yes | No  | Yes | High     |
| Lamberton et al., 2015 <sup>38</sup>        | Yes | Yes | Yes | Yes | Yes | Yes | –   | Yes | Yes | Yes | High     |
| Moya et al., 2016 <sup>39</sup>             | Yes | Yes | Yes | Yes | Yes | Yes | Yes | No  | Yes | Yes | High     |
| Mweya et al., 2007 <sup>40</sup>            | Yes | Yes | Yes | Yes | Yes | Yes | Yes | –   | No  | Yes | High     |
| Nyagang et al., 2020 <sup>41</sup>          | Yes | Yes | Yes | Yes | Yes | No  | Yes | –   | Yes | No  | High     |
| Okon & Ilugbiyin, 2008 <sup>42</sup>        | Yes | Yes | Yes | Yes | Yes | Yes | Yes | Yes | No  | No  | High     |
| Osei-Atweneboana et al., 2007 <sup>43</sup> | Yes | Yes | Yes | Yes | Yes | Yes | Yes | Yes | Yes | Yes | High     |
| Osue et al., 2013 <sup>44</sup>             | Yes | Yes | Yes | Yes | No  | Yes | Yes | –   | No  | Yes | High     |
| Osue, 2017 <sup>45</sup>                    | Yes | Yes | Yes | Yes | Yes | No  | Yes | No  | No  | Yes | High     |
| Otabil et al., 2019 <sup>46</sup>           | Yes | Yes | Yes | Yes | Yes | No  | Yes | No  | No  | No  | Moderate |
| Paulin et al., 2017 <sup>47</sup>           | Yes | Yes | Yes | Yes | Yes | No  | No  | –   | No  | Yes | High     |
| Richards et al., 2020 <sup>48</sup>         | Yes | Yes | Yes | Yes | Yes | Yes | Yes | Yes | No  | Yes | High     |
| Sam-Wobo et al., 2012 <sup>49</sup>         | Yes | Yes | Yes | Yes | Yes | Yes | Yes | –   | No  | Yes | High     |
| Seidenfaden et al., 2001 <sup>50</sup>      | Yes | Yes | Yes | Yes | Yes | Yes | Yes | Yes | No  | Yes | High     |
| Shintouo et al., 2020 <sup>51</sup>         | Yes | Yes | Yes | Yes | Yes | Yes | Yes | Yes | Yes | Yes | High     |
| Siewe Fodjo et al., 2019 <sup>52</sup>      | Yes | Yes | Yes | Yes | Yes | Yes | Yes | –   | Yes | Yes | High     |
| Sufi & Zainab, 2015 <sup>53</sup>           | Yes | Yes | Yes | Yes | Yes | No  | No  | –   | No  | No  | Moderate |
| Surakat et al., 2018 <sup>54</sup>          | Yes | Yes | Yes | Yes | Yes | Yes | Yes | –   | No  | Yes | High     |

|                                           |     |     |     |     |     |     |     |     |     |     |      |
|-------------------------------------------|-----|-----|-----|-----|-----|-----|-----|-----|-----|-----|------|
| Ta et al., 2018 <sup>55</sup>             | Yes | Yes | Yes | Yes | Yes | No  | Yes | –   | No  | Yes | High |
| Tekle et al., 2012 <sup>56</sup>          | Yes | Yes | Yes | Yes | Yes | Yes | Yes | Yes | Yes | Yes | High |
| Tekle et al., 2016 <sup>57</sup>          | Yes | Yes | Yes | Yes | Yes | Yes | Yes | –   | No  | Yes | High |
| Traoré et al., 2009 <sup>58</sup>         | Yes | Yes | Yes | Yes | Yes | Yes | Yes | –   | No  | No  | High |
| Traore et al., 2012 <sup>59</sup>         | Yes | Yes | Yes | Yes | Yes | Yes | Yes | Yes | No  | Yes | High |
| Wanji et al., 2015 <sup>60</sup>          | Yes | Yes | Yes | Yes | Yes | Yes | Yes | Yes | No  | Yes | High |
| Wilson et al., 2016 <sup>61</sup>         | Yes | Yes | Yes | Yes | Yes | Yes | Yes | Yes | Yes | Yes | High |
| Yaya et al., 2014 <sup>62</sup>           | Yes | Yes | Yes | Yes | Yes | Yes | Yes | Yes | Yes | No  | High |
| Zarroug et al., 2016 <sup>63</sup>        | Yes | Yes | Yes | Yes | Yes | Yes | Yes | Yes | No  | Yes | High |
| Mshana et al., 2023 <sup>64</sup>         | Yes | Yes | Yes | Yes | Yes | Yes | Yes | –   | Yes | Yes | High |
| Atekem et al., 2022 <sup>65</sup>         | Yes | Yes | Yes | Yes | Yes | Yes | Yes | Yes | Yes | Yes | High |
| Otabil et al., 2023 <sup>66</sup>         | Yes | Yes | Yes | Yes | Yes | Yes | Yes | –   | Yes | Yes | High |
| Chikezie et al., 2023 <sup>67</sup>       | Yes | Yes | Yes | No  | Yes | Yes | Yes | Yes | Yes | Yes | High |
| Ekpo et al., 2022 <sup>68</sup>           | Yes | Yes | Yes | Yes | Yes | No  | Yes | –   | Yes | Yes | High |
| Bhwana et al., 2023 <sup>69</sup>         | Yes | Yes | Yes | Yes | Yes | Yes | Yes | –   | Yes | Yes | High |
| Efon-Ekanguouo et al., 2023 <sup>70</sup> | Yes | Yes | Yes | Yes | Yes | No  | Yes | –   | Yes | Yes | High |
| Miri et al., 2023 <sup>71</sup>           | Yes | Yes | Yes | Yes | Yes | Yes | Yes | Yes | Yes | Yes | High |
| Anagbogu et al., 2022 <sup>72</sup>       | Yes | Yes | Yes | Yes | Yes | No  | Yes | –   | Yes | Yes | High |
| Ekanya et al., 2022 <sup>73</sup>         | Yes | Yes | Yes | Yes | Yes | Yes | Yes | Yes | Yes | Yes | High |
| Domche et al., 2022 <sup>74</sup>         | Yes | Yes | Yes | Yes | Yes | No  | Yes | Yes | Yes | Yes | High |
| Isiyaku et al., 2022 <sup>75</sup>        | Yes | Yes | Yes | Yes | Yes | Yes | Yes | Yes | Yes | Yes | High |

**Table S5:  $I^2$  and  $\tau^2$  values for quantifying heterogeneity across studies**

| Categories                                                                                   | Sub-categories              | Heterogeneity statistic | Degrees of freedom | $I^2$  | $\tau^2$ |
|----------------------------------------------------------------------------------------------|-----------------------------|-------------------------|--------------------|--------|----------|
| Region                                                                                       | Central Africa (Ref)        |                         |                    |        |          |
|                                                                                              | East Africa                 | 16643.5                 | 282                | 99.63% | 0.02     |
|                                                                                              | West Africa                 |                         |                    |        |          |
| Ecological features                                                                          | Savannah (Ref)              |                         |                    |        |          |
|                                                                                              | Forest                      | 6704.7                  | 169                | 99.98% | 0.02     |
|                                                                                              | Forest-savannah mosaic      |                         |                    |        |          |
| Vector control (Larviciding)                                                                 | No (Ref)                    |                         |                    |        |          |
|                                                                                              | Yes                         | 16786.5                 | 282                | 98.82% | 0.02     |
| Number of years of ivermectin treatment                                                      |                             | 14458.1                 | 282                | 99.65% | 0.01     |
| Proportion never treated                                                                     | $\leq 5\%$ (Ref)            |                         |                    |        |          |
|                                                                                              | $> 5\%$                     | 3067.2                  | 30                 | 99.95% | 0.02     |
| Years of continuous therapeutic treatment at $\geq 80\%$ coverage of the eligible population | $< 10$ years                |                         |                    |        |          |
|                                                                                              | $\geq 10$ years             | 16658.7                 | 195                | 99.35% | 0.02     |
| Baseline endemicity                                                                          | Hypoendemicity (Ref)        |                         |                    |        |          |
|                                                                                              | Mesoendemicity              | 16647.4                 | 282                | 99.79% | 0.02     |
|                                                                                              | Hyperendemicity             |                         |                    |        |          |
|                                                                                              | Holoendemicity              |                         |                    |        |          |
| Co-endemicity                                                                                | Not reported                |                         |                    |        |          |
|                                                                                              | <i>Loa loa</i>              | 16285.2                 | 282                | 99.91% | 0.02     |
|                                                                                              | <i>Wuchereria bancrofti</i> |                         |                    |        |          |

Ref: Reference group.

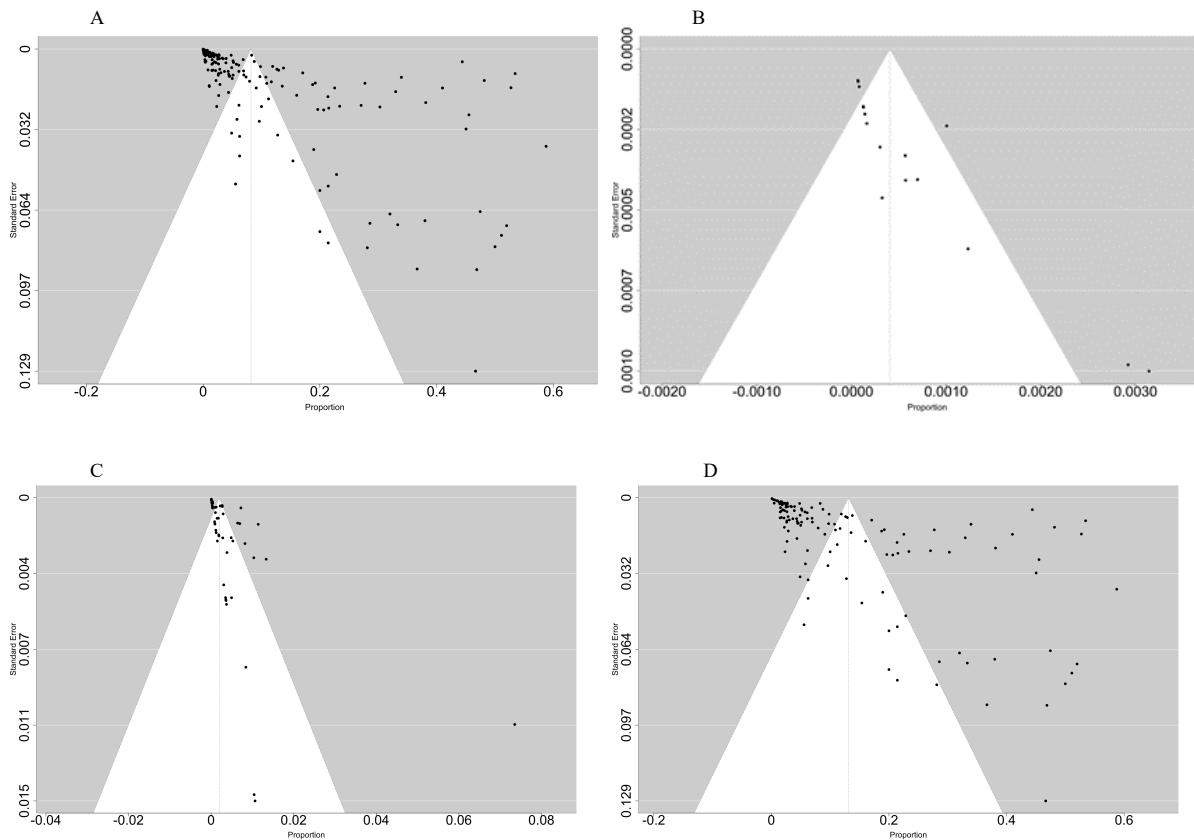

**Figure S1:** Funnel plots for standard error of the difference between microfilarial (mf) prevalence (number positive/examined) following the intervention period for: (A) the total number of records reporting parasitological information on this variable; (B) records reporting elimination of transmission; (C) records classified as close to elimination; (D) records reporting ongoing transmission. The black dots represent the mf prevalence (proportion) of individual studies. The unshaded area inside the diagonal dotted lines represents the region where 95% of the data points would lie if there were no systematic heterogeneity/publication bias. The dashed vertical line shows the average standardized mean difference of the microfilarial prevalence. The observed publication bias, indicated by studies deviating from the funnel plots to the shaded regions may be attributed to several reasons. One is the criteria employed for study inclusion, which selectively excluded foci characterized by treatment durations of less than ten years. Secondly, the exclusion of grey literature may have influenced the distinct shape of the funnel plot distribution. The heterogeneity evident in our studies, stemming from disparate population characteristics and variations in blackfly species, may contribute to the observed distribution patterns within the funnel plots.

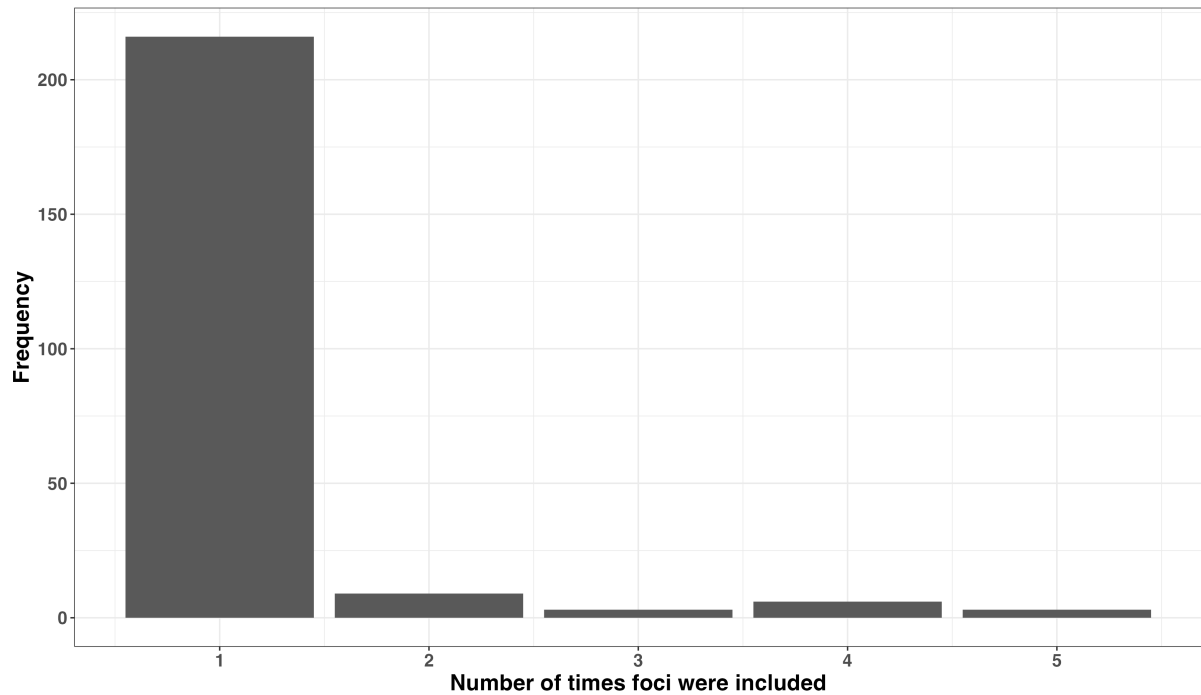

**Figure S2:** Frequency histogram showing the number of times the retrieved records from the 238 distinct endemic foci entered the analysis. Of the 282 records identified, 216 (77%) were included once; 10 (3.5%) were included two times (Abu Hamed, Asubende, Bandjoun, Kaduna, Kasese, Kebbi, Mahenge, Ogun, Plateau and Nasarawa); 3 (1%) were included three times (Bandja, River Gambia and Tukuyu); 6 (2%) four times (Bakoye, Bafang, Bafia, Bangangte, Foubot and Kekem), and 3 (1%) five times (Bioko, Falémé and Massangam). Therefore, some records were classified into one or more transmission status categories, according to when epidemiological evaluations were conducted that reported ongoing transmission, close to elimination, or elimination of transmission.

**Table S6: Characteristics of the 282 records (from 238 distinct onchocerciasis-endemic foci) that were included in the analysis**

| Author and year of publication     | Year of study | Country       | Subnational area / focus                                                         | Baseline endemicity | Years of MDA | Frequency MDA                 | Years biannual MDA | Therapeutic coverage of eligibles <sup>8</sup> | Years of therapeutic coverage $\geq 80\%$ elig. | <i>Simulium</i> spp.    | Vector control, no. yr | Transmission status  | PTS |
|------------------------------------|---------------|---------------|----------------------------------------------------------------------------------|---------------------|--------------|-------------------------------|--------------------|------------------------------------------------|-------------------------------------------------|-------------------------|------------------------|----------------------|-----|
| <i>West African region</i>         |               |               |                                                                                  |                     |              |                               |                    |                                                |                                                 |                         |                        |                      |     |
| Borsboom et al., 2003 <sup>6</sup> | 2002          | Burkina Faso  | Dienkoa                                                                          | Hyper-endemic       | 13           | Annual                        | 0                  | $\geq 80\%$                                    | –                                               | <i>S. damnosum</i> s.l. | Yes; 26 years          | Ongoing transmission | –   |
| Koudou et al., 2018 <sup>33</sup>  | 2007–2016     | Côte d'Ivoire | Oumé                                                                             | Hyper-endemic       | 18           | Annual, biannual in 1995–1996 | 1                  | $< 80\%$                                       | –                                               | <i>S. damnosum</i> s.l. | Yes, 5 years           | Close to elimination | –   |
| Koudou et al., 2018 <sup>33</sup>  | 2007–2016     | Côte d'Ivoire | Yamoussoukro                                                                     | Hypo-endemic        | 18           | Annual                        | 0                  | $\geq 80\%$                                    | –                                               | <i>S. damnosum</i> s.l. | Yes, 5 years           | Close to elimination | –   |
| Koudou et al., 2018 <sup>33</sup>  | 2007–2016     | Côte d'Ivoire | Odienné, Korhogo, Zuénoula                                                       | Meso-endemic        | 20           | Annual, biannual in 1995–1996 | 1                  | $\geq 80\%$                                    | –                                               | <i>S. damnosum</i> s.l. | Yes, 5 years           | Close to elimination | –   |
| Koudou et al., 2018 <sup>33</sup>  | 2007–2016     | Côte d'Ivoire | Adzope, Boundiali, Mankono                                                       | Hyper-endemic       | 20           | Annual, biannual in 1995–1996 | 1                  | $< 80\%$                                       | –                                               | <i>S. damnosum</i> s.l. | Yes, at least 5 years  | Close to elimination | –   |
| Koudou et al., 2018 <sup>33</sup>  | 2007–2016     | Côte d'Ivoire | Agboville, Tengrela, Issia                                                       | Hyper-endemic       | 20           | Annual, biannual in 1995–1996 | 1                  | –                                              | –                                               | <i>S. damnosum</i> s.l. | Yes, 5 years           | Close to elimination | –   |
| Koudou et al., 2018 <sup>33</sup>  | 2007–2016     | Côte d'Ivoire | Tiassalé, Bouaké                                                                 | –                   | 16,18        | Annual, biannual in 1995–1996 | 1                  | $< 80\%$                                       | –                                               | <i>S. damnosum</i> s.l. | Yes, 5 years           | Ongoing transmission | –   |
| Koudou et al., 2018 <sup>33</sup>  | 2007–2016     | Côte d'Ivoire | Daloa, Man, Danané, Seguela, Bondoukou, Bouna, Bèoumi, Bouaflé, Biankouma, Alépé | Meso-endemic        | 16-18        | Annual, biannual in 1995–1996 | 1                  | $\geq 80\%$                                    | –                                               | <i>S. damnosum</i> s.l. | Yes, 5 years           | Ongoing transmission | –   |
| Koudou et al., 2018 <sup>33</sup>  | 2007–2016     | Côte d'Ivoire | Touba, Agnibilékro, Abengourou, Dabakala, Dimbokro, Daoukro, M'Bahiakro,         | Hyper-endemic       | 20           | Annual, biannual in 1995–1996 | 1                  | $\geq 80\%$                                    | –                                               | <i>S. damnosum</i> s.l. | Yes, 5 years           | Ongoing transmission | –   |

|                                             |                        |               |                                                                             |               |       |                                                   |                |      |    |                                                                   |                                  |                      |   |
|---------------------------------------------|------------------------|---------------|-----------------------------------------------------------------------------|---------------|-------|---------------------------------------------------|----------------|------|----|-------------------------------------------------------------------|----------------------------------|----------------------|---|
|                                             |                        |               | Katiola,<br>Bocanda                                                         |               |       |                                                   |                |      |    |                                                                   |                                  |                      |   |
| Koudou et al., 2018 <sup>33</sup>           | 2007–2016              | Côte d'Ivoire | Soubré,<br>Sassandra,<br>Ferkéssédougo<br>Ouangolo                          | Hyper-endemic | 20    | Annual,<br>biannual in<br>1995–1996               | 1              | –    | –  | <i>S. damnosum</i> s.l.                                           | Yes, 5 years                     | Ongoing transmission | – |
| Borsboom et al., 2003 <sup>6</sup>          | 2002                   | Ghana         | Asubende                                                                    | Hyper-endemic | 14    | Annual                                            | 0              | <80% | –  | <i>S. damnosum</i> s.l.                                           | Yes; 11 years                    | Ongoing transmission | – |
| Borsboom et al., 2003 <sup>6</sup>          | 2002                   | Ghana         | Bui Gorge                                                                   | Hyper-endemic | 14    | Annual,<br>quarterly<br>frequency in<br>1994–1996 | 2<br>quarterly | ≥80% | NA | <i>S. damnosum</i> s.l.                                           | Yes; 21 years                    | Close to elimination | – |
| Osei-Atweneboana et al., 2007 <sup>43</sup> | 2004–2005              | Ghana         | Kintampo                                                                    | –             | 17    | Annual                                            | 0              | <80% | –  | <i>S. damnosum</i> s.l.                                           | No                               | Ongoing transmission | – |
| Osei-Atweneboana et al., 2007 <sup>43</sup> | 2004–2005              | Ghana         | Atebubu                                                                     | –             | 17    | Annual                                            | 0              | <80% | –  | <i>S. damnosum</i> s.l.                                           | No                               | Close to elimination | – |
| Osei-Atweneboana et al., 2007 <sup>43</sup> | 2004–2005              | Ghana         | Nkoranza                                                                    | –             | 12    | Annual                                            | 0              | <80% | –  | <i>S. damnosum</i> s.l.                                           | No                               | Close to elimination | – |
| Osei-Atweneboana et al., 2007 <sup>43</sup> | 2004–2005              | Ghana         | East Gonja                                                                  | –             | 11    | Annual                                            | 0              | <80% | –  | <i>S. damnosum</i> s.l.                                           | No                               | Close to elimination | – |
| Lamberton et al., 2015 <sup>38</sup>        | 2009–2011              | Ghana         | Asukawkaw<br>Ferry, Dodi<br>Papase                                          | Hyper-endemic | 18    | Annual                                            | 0              | <80% | –  | <i>S. damnosum</i> s.l.                                           | Yes, 5 and 15 years respectively | Ongoing transmission | – |
| Lamberton et al., 2015 <sup>38</sup>        | 2009–2011              | Ghana         | Pillar 83/Djodji                                                            | Hyper-endemic | 18    | Annual,<br>biannual in<br>1993-1997               | 4              | ≥80% | –  | <i>S. damnosum</i> s.l.                                           | Yes, 15 years                    | Ongoing transmission | – |
| Lamberton et al., 2015 <sup>38</sup>        | 2009–2011              | Ghana         | Asubende                                                                    | Hyper-endemic | 14    | Biannual                                          | 2              | ≥80% | –  | <i>S. damnosum</i> s.l.                                           | Yes, 13 years                    | Ongoing transmission | – |
| Lamberton et al., 2015 <sup>38</sup>        | 2009–2011              | Ghana         | Agborlekame                                                                 | Hyper-endemic | 24    | Biannual                                          | 2              | <80% | –  | <i>S. damnosum</i> s.l.                                           | Yes, 27 years                    | Ongoing transmission | – |
| Garms et al., 2015 <sup>12</sup>            | 2006,<br>2013–<br>2014 | Ghana         | Toll bridge,<br>Buabenso,<br>Adwuman,<br>Akropong,<br>Kyekyewere,<br>Amofo, | Hyper-endemic | 10–14 | Annual                                            | 0              | –    | –  | <i>S. damnosum</i> s.l.<br><br><i>S. sancti-pauli</i><br>affected | No                               | Ongoing transmission | – |



|                                    |           |                  |                                                                                                         |                                                 |    |                                                                           |                             |                                |   |                             |                                          |                             |                                                       |
|------------------------------------|-----------|------------------|---------------------------------------------------------------------------------------------------------|-------------------------------------------------|----|---------------------------------------------------------------------------|-----------------------------|--------------------------------|---|-----------------------------|------------------------------------------|-----------------------------|-------------------------------------------------------|
|                                    |           |                  | Badowa, Foso, Nyaduom, Asaman, Awisam, Asma camp, Zion camp, Buabin & Imbraim                           |                                                 |    |                                                                           |                             |                                |   | by gold-mining in river Pra |                                          |                             |                                                       |
| Otabil et al., 2019 <sup>46</sup>  | 2017      | Ghana            | Nkoranza North                                                                                          | –                                               | 19 | Annual                                                                    | 0                           | –                              | – | <i>S. damnosum</i> s.l.     | No                                       | Ongoing transmission        | –                                                     |
| Otabil et al., 2023 <sup>66</sup>  | 2020–2021 | Ghana            | Tain District, Wenchi Municipality                                                                      | Meso-endemic                                    | 27 | Biannual                                                                  | 12 (in Tain), 3 (in Wenchi) | ≥80%                           | – | <i>S. damnosum</i> s.l.     | Yes; 20 years in Tain, 4 years in Wenchi | Ongoing transmission        | –                                                     |
| Biritwum et al., 2021 <sup>5</sup> | 2016      | Ghana            | Ashanti, Brong Ahafo, Central, Eastern, Greater Accra, Northern, Upper East, Upper West, Volta, Western | Hyper-endemic                                   | 24 | Biannual since 2009 in villages along some river basins according to risk | 7                           | <80%<br>≥80%                   | 3 | <i>S. damnosum</i> s.l.     | Yes; 28 years                            | Close to elimination        | –                                                     |
| Borsboom et al., 2003 <sup>6</sup> | 2002      | Guinea           | Milo & Sankarani                                                                                        | Hyper-endemic                                   | 12 | Annual                                                                    | 0                           | <80%                           | – | <i>S. damnosum</i> s.l.     | Yes; 12 years                            | Ongoing transmission        | –                                                     |
| Borsboom et al., 2003 <sup>6</sup> | 2002      | Guinea & Mali    | Bafing                                                                                                  | Meso-endemic                                    | 12 | Annual                                                                    | 0                           | <80%                           | – | <i>S. damnosum</i> s.l.     | No                                       | Ongoing transmission        | –                                                     |
| Borsboom et al., 2003 <sup>6</sup> | 2002      | Guinea & Mali    | River Bakoye                                                                                            | Hyper-endemic                                   | 12 | Annual                                                                    | 0                           | <80%                           | – | <i>S. damnosum</i> s.l.     | No                                       | Ongoing transmission        | –                                                     |
| Borsboom et al., 2003 <sup>6</sup> | 2002      | Guinea & Senegal | River Mako & River Senegal                                                                              | Hyper-endemic                                   | 12 | Biannual since 1989                                                       | 12                          | ≥80%                           | – | <i>S. damnosum</i> s.l.     | No                                       | Ongoing transmission        | –                                                     |
| Borsboom et al., 2003 <sup>6</sup> | 2002      | Mali             | Tienfala                                                                                                | Hyper-endemic                                   | 14 | Annual                                                                    | 0                           | ≥80%                           | – | <i>S. damnosum</i> s.l.     | Yes- 7 years                             | Ongoing transmission        | –                                                     |
| Borsboom et al., 2003 <sup>6</sup> | 2002      | Mali & Senegal   | River Falémé                                                                                            | Hyper-endemic                                   | 12 | Annual                                                                    | –                           | ≥80%                           | – | <i>S. damnosum</i> s.l.     | No                                       | Ongoing transmission        | –                                                     |
| Diawara et al., 2009 <sup>7</sup>  | 2006–2008 | Mali             | River Bakoye                                                                                            | Hypo-(23%) to hyper-endemic (38%) <sup>64</sup> | 15 | Annual                                                                    | 0                           | <80% (38–78%)<br>≥80% (73–83%) | 8 | <i>S. damnosum</i> s.l.     | No                                       | Elimination of transmission | Yes, in 2009–2011 by Traore et al, 2012 <sup>30</sup> |

|                                        |           |                |                                      |                                                 |       |                     |    |                                    |       |                         |     |                             |                                                       |
|----------------------------------------|-----------|----------------|--------------------------------------|-------------------------------------------------|-------|---------------------|----|------------------------------------|-------|-------------------------|-----|-----------------------------|-------------------------------------------------------|
| Diawara et al., 2009 <sup>7</sup>      | 2006–2008 | Mali & Senegal | River Falémé                         | Hypo- to hyper-endemic                          | 16    | Annual              | 0  | <80% (38–77%)<br>≥80% (77–81%)     | 8     | <i>S. damnosum</i> s.l. | No  | Elimination of transmission | Yes, in 2009–2011 by Traore et al, 2012 <sup>30</sup> |
| Diawara et al., 2009 <sup>7</sup>      | 2006–2008 | Senegal        | River Gambia                         | Hypo- (7%) to hyper-endemic (50%) <sup>64</sup> | 17    | Biannual since 1989 | 17 | <80%<br>≥80%                       | 8     | <i>S. damnosum</i> s.l. | No  | Elimination of transmission | Yes, in 2009–2011 by Traore et al, 2012 <sup>30</sup> |
| Dolo et al., 2021 <sup>9</sup>         | 2017–2018 | Mali           | River Bakoye                         | Hyper-endemic                                   | 24–25 | Annual              | 0  | –                                  | –     | <i>S. damnosum</i> s.l. | Yes | Elimination of transmission | LF co-endemicity, PTS not conducted                   |
| Dolo et al., 2021 <sup>9</sup>         | 2017–2018 | Mali           | River Falémé                         | Meso-endemic                                    | 24–25 | Annual              | 0  | –                                  | –     | <i>S. damnosum</i> s.l. | Yes | Elimination of transmission | LF co-endemicity, PTS not conducted                   |
| Anosike et al., 2007 <sup>2</sup>      | 2005      | Nigeria        | Abia                                 | Meso-endemic                                    | 11    | Annual              | 0  | –                                  | –     | <i>S. damnosum</i> s.l. | No  | Ongoing transmission        | –                                                     |
| Anosike et al., 2007 <sup>2</sup>      | 2005      | Nigeria        | Imo                                  | Meso-endemic                                    | 12    | Annual              | 0  | –                                  | –     | <i>S. damnosum</i> s.l. | No  | Ongoing transmission        | –                                                     |
| Anosike et al., 2007 <sup>2</sup>      | 2005      | Nigeria        | Enugu                                | Meso-endemic                                    | 10    | Annual              | 0  | –                                  | –     | <i>S. damnosum</i> s.l. | No  | Ongoing transmission        | –                                                     |
| Anosike et al., 2007 <sup>2</sup>      | 2005      | Nigeria        | Anambra                              | Meso-endemic                                    | 10    | Annual              | 0  | –                                  | –     | <i>S. damnosum</i> s.l. | No  | Ongoing transmission        | –                                                     |
| Kogi and Bulus, 2008 <sup>31</sup>     | 2002      | Nigeria        | Galadimawa                           | Hyper-endemic                                   | 12    | Annual              | 0  | –                                  | –     | <i>S. damnosum</i> s.l. | No  | Ongoing transmission        | –                                                     |
| Okon and Ilugbiyin, 2008 <sup>42</sup> | 2006      | Nigeria        | Cross-River State, Aninegeye         | Hyper-endemic                                   | 14    | Annual              | 0  | –                                  | –     | <i>S. damnosum</i> s.l. | No  | Ongoing transmission        | –                                                     |
| Sam-Wobo et al., 2012 <sup>49</sup>    | 2009      | Nigeria        | Oyo & Ogun States, Ogun river system | –                                               | 14–15 | Annual              | 0  | –                                  | –     | <i>S. damnosum</i> s.l. | No  | Ongoing transmission        | –                                                     |
| Tekle et al., 2012 <sup>56</sup>       | 2008      | Nigeria        | Kaduna State, Birnin Gwari           | Hypo- to hyper-endemic (Median = meso-endemic)  | 15    | Annual              | 0  | ≥80%<br>Median = 77.7 (74.4–80.4)% | 15–17 | <i>S. damnosum</i> s.l. | No  | Close to elimination        | –                                                     |
| Tekle et al., 2012 <sup>56</sup>       | 2008      | Nigeria        | Kaduna State, Kauru                  | Hypo- to hyper-endemic                          | 15    | Annual              | 0  | ≥80%                               | 15–17 | <i>S. damnosum</i> s.l. | No  | Close to elimination        | –                                                     |

|                                     |                  |         |                                                                                                  |                                                |       |        |   |                                    |       |                         |    |                      |   |
|-------------------------------------|------------------|---------|--------------------------------------------------------------------------------------------------|------------------------------------------------|-------|--------|---|------------------------------------|-------|-------------------------|----|----------------------|---|
|                                     |                  |         |                                                                                                  | (Median = meso-endemic)                        |       |        |   | Median = 77.7 (74.4–80.4)%         |       |                         |    |                      |   |
| Tekle et al., 2012 <sup>56</sup>    | 2008             | Nigeria | Kaduna State, Lere                                                                               | Hypo- to hyper-endemic (Median = meso-endemic) | 15    | Annual | 0 | ≥80%<br>Median = 77.7 (74.4–80.4)% | 15–17 | <i>S. damnosum</i> s.l. | No | Close to elimination | – |
| Osue et al., 2013 <sup>44</sup>     | 2011             | Nigeria | Kaduna State, Kachia Local Government Area                                                       | Meso-endemic                                   | 18    | Annual | 0 | ≥80%                               | –     | <i>S. damnosum</i> s.l. | No | Close to elimination | – |
| Evans et al., 2014 <sup>10</sup>    | 2009             | Nigeria | Nasarawa & Plateau States                                                                        | Meso-endemic                                   | 17    | Annual | 0 | ≥80%                               | 14    | <i>S. damnosum</i> s.l. | No | Close to elimination | – |
| Sufi and Zainab, 2015 <sup>53</sup> | 2012             | Nigeria | Kano State, Zainabi & Ririwai                                                                    | –                                              | 10    | Annual | 0 | –                                  | –     | <i>S. damnosum</i> s.l. | No | Ongoing transmission | – |
| Tekle et al., 2016 <sup>57</sup>    | 2013             | Liberia | Lofa, Bong, Nimba                                                                                | Meso-endemic                                   | 14    | Annual | 0 | <80%                               | –     | <i>S. damnosum</i> s.l. | No | Ongoing transmission | – |
| Tekle et al., 2016 <sup>57</sup>    | 2012, 2013       | Nigeria | Adamawa, FCT, Kano, Kebbi, Niger, Osun, Oyo, Plateau Nasarawa                                    | Meso- to hyper-endemic                         | 10–14 | Annual | 0 | <80%                               | –     | <i>S. damnosum</i> s.l. | No | Close to elimination | – |
| Tekle et al., 2016 <sup>57</sup>    | 2009, 2012, 2013 | Nigeria | Cross River, Ebonyi, Enugu Anambra, Ekiti, Kwara & Tabara                                        | Meso- to hyper-endemic                         | 10–14 | Annual | 0 | <80%                               | –     | <i>S. damnosum</i> s.l. | No | Ongoing elimination  | – |
| Tekle et al., 2016 <sup>57</sup>    | 2012             | Nigeria | Kaduna State                                                                                     | Hyper-endemic                                  | 21    | Annual | 0 | <80%                               | –     | <i>S. damnosum</i> s.l. | No | Close to elimination | – |
| Osue Hudu, 2017 <sup>45</sup>       | 2004             | Nigeria | Gurara River basin                                                                               | –                                              | 10    | Annual | 0 | <80%                               | –     | <i>S. damnosum</i> s.l. | No | Ongoing transmission | – |
| Surakat et al., 2018 <sup>54</sup>  | 2015             | Nigeria | Ogun State: Okeda, Abeokuta North and South, Imeko-Afon, Ewekoro, Ifo, Obafemi-Owode, Yewa North | Meso-endemic                                   | 10    | Annual | 0 | <80%                               | –     | <i>S. damnosum</i> s.l. | No | Ongoing transmission | – |

|                                        |                                    |         |                                                                                                                                                                                    |                        |       |          |   |      |       |                         |    |                                                                      |                                                      |
|----------------------------------------|------------------------------------|---------|------------------------------------------------------------------------------------------------------------------------------------------------------------------------------------|------------------------|-------|----------|---|------|-------|-------------------------|----|----------------------------------------------------------------------|------------------------------------------------------|
| Siewe Fodjo et al., 2019 <sup>52</sup> | 2018                               | Nigeria | Imo River basin                                                                                                                                                                    | –                      | 13    | Biannual | 6 | ≥80% | –     | <i>S. damnosum</i> s.l. | No | Ongoing transmission                                                 | –                                                    |
| Richards et al., 2020 <sup>48</sup>    | 2017                               | Nigeria | Nasarawa & Plateau States                                                                                                                                                          | Meso- to hyper-endemic | 16,19 | Annual   | 0 | ≥80% | 22    | <i>S. damnosum</i> s.l. | No | Elimination of transmission                                          | Yes, in 2019-2021 by Miri et al., 2023 <sup>71</sup> |
| Chikezie et al., 2023 <sup>67</sup>    | 2018–2019                          | Nigeria | Cross River State: Agbokim, Aningeje, Ekong Anaku, Orimekpang                                                                                                                      | –                      | 27    | Annual   | – | <80% | –     | <i>S. damnosum</i> s.l. | No | Close to elimination (3/4) to Ongoing transmission (1/4 villages)    | –                                                    |
| Ekpo et al., 2022 <sup>68</sup>        | 2020–2021                          | Nigeria | Enugu & Ogun States: Amokwe, Eziobodo, Obinagu/ Eziama, Ugwuorie, Umuezemanna, Umunnakwe, Abule Aje, Abule Peter, Adeaga, Ibara Afon, Ibaro, Idode, Imomo, Isara, Olokemeji, Olowo | Hypo- to hyper-endemic | 11–26 | Annual   | – | ≥80% | –     | <i>S. damnosum</i> s.l. | No | Close to elimination (1/16) to Ongoing transmission (15/16 villages) | –                                                    |
| Anagbogu et al., 2022 <sup>72</sup>    | 2017                               | Nigeria | Cross River, Taraba & Yobe States: Bade, Ikom, Bekwara, Gashaka, Karim-Lamido                                                                                                      | Hypo- to hyper-endemic | –     | Annual   | – | ≥80% | –     | <i>S. damnosum</i> s.l. | No | Close to elimination                                                 | –                                                    |
| Isiyaku et al., 2022 <sup>75</sup>     | 2016 (human)<br>2017–2020 (vector) | Nigeria | Kaduna, Kebbi, Zamfara States                                                                                                                                                      | Hypo- to hyper-endemic | 20–28 | Annual   | – | ≥80% | 12–20 | <i>S. damnosum</i> s.l. | No | Elimination of transmission                                          | –                                                    |

|                                        |           |          |                                                               |               |    |                                             |    |      |    |                         |               |                      |   |
|----------------------------------------|-----------|----------|---------------------------------------------------------------|---------------|----|---------------------------------------------|----|------|----|-------------------------|---------------|----------------------|---|
| Wilson et al., 2016 <sup>61</sup>      | 2014      | Senegal  | River Falémé & River Kaolakabe                                | –             | 16 | Annual                                      | 0  | <80% | –  | <i>S. damnosum</i> s.l. | No            | Close to elimination | – |
| Wilson et al., 2016 <sup>61</sup>      | 2014      | Senegal  | River Gambia                                                  | Hyper-endemic | 18 | Biannual since 1990                         | 24 | <80% | –  | <i>S. damnosum</i> s.l. | No            | Close to elimination | – |
| Borsboom et al., 2003 <sup>6</sup>     | 2002      | Togo     | Titira & Kouporgou                                            | Hyper-endemic | 13 | Annual                                      | 0  | ≥80% | –  | <i>S. damnosum</i> s.l. | Yes, 24 years | Ongoing transmission | – |
| Komlan et al., 2018 <sup>32</sup>      | 2015      | Togo     | Central Togo                                                  | Hyper-endemic | 25 | Annual, with biannual from 2003–2012 in SIZ | 9  | ≥80% | 12 | <i>S. damnosum</i> s.l. | Yes, 26 years | Ongoing transmission | – |
| Komlan et al., 2018 <sup>32</sup>      | 2015      | Togo     | Northern Togo                                                 | Hyper-endemic | 25 | Annual, with biannual from 2003–2012 in SIZ | 9  | ≥80% | 12 | <i>S. damnosum</i> s.l. | Yes, 15 years | Ongoing transmission | – |
| Johanns et al., 2022 <sup>18</sup>     | 2019      | Togo     | Region Centrale                                               | Hyper-endemic | 30 | Annual, biannual from 2003-2012 in SIZ      | 9  | –    | –  | <i>S. damnosum</i> s.l. | Yes, 31 years | Ongoing transmission | – |
| <b>Central African region</b>          |           |          |                                                               |               |    |                                             |    |      |    |                         |               |                      |   |
| Seidenfaden et al., 2001 <sup>50</sup> | 1996–1998 | Cameroon | Vina du Nord                                                  | Hyper-endemic | 10 | Annual                                      | 0  | <80% | –  | <i>S. damnosum</i> s.l. | No            | Ongoing transmission | – |
| Borsboom et al., 2003 <sup>6</sup>     | 2002      | Cameroon | Vina Valley                                                   | Hyper-endemic | 13 | Annual                                      | 0  | <80% | –  | <i>S. damnosum</i> s.l. | No            | Ongoing transmission | – |
| Katarbarwa et al., 2008 <sup>22</sup>  | 2005      | Cameroon | Bangante, Foubot, Bafang, Kekem, Bandja                       | Hyper-endemic | 10 | Annual                                      | 0  | ≥80% | –  | <i>S. damnosum</i> s.l. | No            | Ongoing transmission | – |
| Katarbarwa et al., 2008 <sup>22</sup>  | 2005      | Cameroon | Kekem                                                         | Hyper-endemic | 10 | Annual                                      | 0  | <80% | –  | <i>S. damnosum</i> s.l. | No            | Ongoing transmission | – |
| Katarbarwa et al., 2011 <sup>23</sup>  | 2008-2009 | Cameroon | Rey-Bouba Health District                                     | Hyper-endemic | 12 | Annual                                      | 0  | ≥80% | 6  | <i>S. damnosum</i> s.l. | No            | Ongoing transmission | – |
| Katarbarwa et al., 2011 <sup>23</sup>  | 2008-2010 | Cameroon | Tcholliré                                                     | Meso-endemic  | 12 | Annual                                      | 0  | ≥80% | 7  | <i>S. damnosum</i> s.l. | No            | Close to elimination | – |
| Katarbarwa et al., 2011 <sup>23</sup>  | 2008-2009 | Cameroon | Toubo Health District                                         | Hyper-endemic | 17 | Annual                                      | 0  | ≥80% | 6  | <i>S. damnosum</i> s.l. | No            | Ongoing transmission | – |
| Katarbarwa et al., 2013a <sup>25</sup> | 2011      | Cameroon | Bafang, Baham, Bandja, Bangante, Foubot, Kekem, Penka-Michel, | Hyper-endemic | 14 | Annual                                      | 0  | ≥80% | 8  | <i>S. damnosum</i> s.l. | No            | Ongoing transmission | – |

|                                     |           |          |                                                                                                 |               |       |        |   |                     |    |                         |    |                      |   |
|-------------------------------------|-----------|----------|-------------------------------------------------------------------------------------------------|---------------|-------|--------|---|---------------------|----|-------------------------|----|----------------------|---|
|                                     |           |          | Foumban, Kouoptamo, Malantouen, Massangam                                                       |               |       |        |   |                     |    |                         |    |                      |   |
| Katarwa et al., 2013a <sup>25</sup> | 2011      | Cameroon | Foumban, Folap village                                                                          | –             | 14    | Annual | 0 | ≥80%                | 8  | <i>S. damnosum</i> s.l. | No | Close to elimination | – |
| Wanji et al., 2015 <sup>60</sup>    | 2011-2012 | Cameroon | Manyu River, Mungo & Meme basin                                                                 | Hyper-endemic | 10–14 | Annual | 0 | <80%                | –  | <i>S. damnosum</i> s.l. | No | Ongoing transmission | – |
| Tekle et al., 2016 <sup>57</sup>    | 2010-2012 | Cameroon | North Tcholliré, Centre 1, Littoral 2, Western Province, Adamawa II, South West 1, South West 2 | Hyper-endemic | 11    | Annual | 0 | <80%                | –  | <i>S. damnosum</i> s.l. | No | Ongoing transmission | – |
| Tekle et al., 2016 <sup>57</sup>    | 2010      | Cameroon | North Toubouro                                                                                  | –             | 21    | Annual | 0 | <80%                | –  | <i>S. damnosum</i> s.l. | No | Ongoing transmission | – |
| Kamga et al., 2016 <sup>19</sup>    | 2015      | Cameroon | Bafia & Yabassi Health Districts                                                                | Hyper-endemic | 15,16 | Annual | 0 | <80%                | –  | <i>S. damnosum</i> s.l. | No | Ongoing transmission | – |
| Kamga et al., 2017 <sup>20</sup>    | 2015      | Cameroon | Bafang, Bandja, Bandjoun, Bangangte, Foumbot, Kekem, Massangam Health Districts                 | Hyper-endemic | 19    | Annual | 0 | <80% except Bandja  | –  | <i>S. damnosum</i> s.l. | No | Ongoing transmission | – |
| Kamga et al., 2018 <sup>21</sup>    | 2015      | Cameroon | Bafia, Foumbot-Massangam, Yabassi Health Districts                                              | Hyper-endemic | 15    | Annual | 0 | ≥80% except Yabassi | 3  | <i>S. damnosum</i> s.l. | No | Ongoing transmission | – |
| Bakajika et al., 2018 <sup>4</sup>  | 2015-2016 | Cameroon | Massangam                                                                                       | Hyper-endemic | 20    | Annual | 0 | ≥80%                | –  | <i>S. damnosum</i> s.l. | No | Ongoing transmission | – |
| Abong et al., 2020 <sup>1</sup>     | 2016–2017 | Cameroon | Bafia Health District                                                                           | –             | >20   | Annual | 0 | ≥80%                | –  | <i>S. damnosum</i> s.l. | No | Ongoing transmission | – |
| Abong et al., 2020 <sup>1</sup>     | 2016–2017 | Cameroon | Melong                                                                                          | Hyper-endemic | 10    | Annual | 0 | ≥80%                | –  | <i>S. damnosum</i> s.l. | No | Ongoing transmission | – |
| Aza'ah et al., 2020 <sup>3</sup>    | 2018      | Cameroon | Ndikinimeki                                                                                     | Hyper-endemic | 20    | Annual | 0 | <80%                | –  | <i>S. damnosum</i> s.l. | No | Ongoing transmission | – |
| Nyagang et al., 2020 <sup>41</sup>  | 2017-2018 | Cameroon | Tombel                                                                                          | Hyper-endemic | 15    | Annual | 0 | ≥80%                | 13 | <i>S. damnosum</i> s.l. | No | Ongoing transmission | – |

|                                           |           |                          |                                                                          |                        |     |          |   |      |   |                         |              |                      |   |
|-------------------------------------------|-----------|--------------------------|--------------------------------------------------------------------------|------------------------|-----|----------|---|------|---|-------------------------|--------------|----------------------|---|
| Shintouo et al., 2020 <sup>51</sup>       | 2019      | Cameroon                 | Bandjoun, Bangangte & Foubot                                             | –                      | 23  | Annual   | 0 | –    | – | <i>S. damnosum</i> s.l. | No           | Close to elimination | – |
| Shintouo et al., 2020 <sup>51</sup>       | 2019      | Cameroon                 | Bafang Kekem & Massangam                                                 | –                      | 23  | Annual   | 0 | –    | – | <i>S. damnosum</i> s.l. | No           | Ongoing transmission | – |
| Forrer et al., 2021 <sup>11</sup>         | 2017      | Cameroon                 | Meme River basin                                                         | –                      | >15 | Annual   | 0 | <80% | – | <i>S. damnosum</i> s.l. | No           | Ongoing transmission | – |
| Djune-Yemeli et al., 2022 <sup>19</sup>   | 2019      | Cameroon                 | Bafia Health district                                                    | Meso-endemic           | 20  | Annual   | 0 | –    | – | <i>S. damnosum</i> s.l. | No           | Ongoing transmission | – |
| Atekem et al., 2022 <sup>65</sup>         | 2019      | Cameroon                 | Massangam                                                                | Hypo-endemic           | 23  | Biannual | 5 | <80% | – | <i>S. damnosum</i> s.l. | Yes, 2 years | Ongoing transmission | – |
| Efon-Ekanguouo et al., 2023 <sup>70</sup> | 2021      | Cameroon                 | Babeta, Biatsota, Ngongol, Nyamanga 1, Boneck, Kiboum 1, Kiboum 2        |                        | >20 | Annual   | – | ≥80% | – | –                       | No           | Ongoing transmission | – |
| Ekanya et al., 2022 <sup>73</sup>         | 2017      | Cameroon                 | Berenge, Betenge, Big Massaka, Bombele, Kwakwa, Muramba 1, Small Massaka | Hyper- to holo-endemic |     | Annual   | – | ≥80% | – | <i>S. damnosum</i> s.l. | No           | Ongoing transmission | – |
| Domche et al., 2022 <sup>74</sup>         | 2019-2020 | Cameroon                 | Bayomen, Biatsota                                                        | Hyper- to holo-endemic | 24  | Annual   | – | ≥80% | – | –                       | No           | Ongoing transmission | – |
| Tekle et al., 2016 <sup>57</sup>          | 2010      | Central African Republic | Basse-Kotto                                                              | Hyper-endemic          | 11  | Annual   | 0 | <80% | – | <i>S. damnosum</i> s.l. | No           | Ongoing transmission | – |
| Tekle et al., 2016 <sup>57</sup>          | 2012      | Central African Republic | Ouaham Pende & Ouaka                                                     | Hyper-endemic          | 13  | Annual   | 0 | <80% | – | <i>S. damnosum</i> s.l. | No           | Close to elimination | – |
| Yaya et al., 2014 <sup>62</sup>           | 2010      | Central African Republic | Gami                                                                     | Hyper-endemic          | 22  | Annual   | 0 | <80% | – | <i>S. damnosum</i> s.l. | No           | Ongoing transmission | – |
| Tekle et al., 2016 <sup>57</sup>          | 2012-2014 | Chad                     | Logon Occidental, Logon Oriental, Mandoul, Mayo Kebbi East,              | Hyper-endemic          | 16  | Annual   | 0 | <80% | – | <i>S. damnosum</i> s.l. | No           | Close to elimination | – |

|                                               |           |                              |                                  |               |          |                          |   |      |    |                                                            |                                    |                             |                                                       |
|-----------------------------------------------|-----------|------------------------------|----------------------------------|---------------|----------|--------------------------|---|------|----|------------------------------------------------------------|------------------------------------|-----------------------------|-------------------------------------------------------|
|                                               |           |                              | Moyen Chari,<br>Tandjile         |               |          |                          |   |      |    |                                                            |                                    |                             |                                                       |
| Tekle et al., 2016 <sup>57</sup>              | 2011      | Congo                        | Bouenza                          | Meso-endemic  | 10       | Annual                   | 0 | <80% | –  | <i>S. damnosum</i> s.l.                                    | No                                 | Close to elimination        | –                                                     |
| Tekle et al., 2016 <sup>57</sup>              | 2012      | Democratic Republic of Congo | Uele                             | Hyper-endemic | 10       | Annual                   | 0 | <80% | –  | <i>S. damnosum</i> s.l.                                    | No                                 | Ongoing transmission        | –                                                     |
| Traoré et al., 2009 <sup>58</sup>             | 2007–2008 | Equatorial Guinea            | Bioko Island                     | Hyper-endemic | 10       | Annual                   | 0 | <80% | –  | Bioko form of <i>S. yahense</i> ( <i>S. damnosum</i> s.l.) | Yes, 2003, 2005, vector eliminated | Ongoing transmission        | –                                                     |
| Hernández-González et al., 2016 <sup>15</sup> | 2014      | Equatorial Guinea            | Bioko Island                     | Hyper-endemic | 19       | Annual                   | 0 | <80% | –  | As above                                                   | As above                           | Close to elimination        | –                                                     |
| Moya et al., 2016 <sup>39</sup>               | 2014      | Equatorial Guinea            | Bioko Island                     | Hyper-endemic | 25       | Annual                   | 0 | –    | –  | As above                                                   | As above                           | Close to elimination        | –                                                     |
| Ta et al., 2018 <sup>55</sup>                 | 2014      | Equatorial Guinea            | Bioko Island                     | Hyper-endemic | 16       | Annual                   | 0 | –    | –  | As above                                                   | As above                           | Close to elimination        | –                                                     |
| Herrador et al., 2018 <sup>16</sup>           | 2016–2017 | Equatorial Guinea            | Bioko Island                     | Hyper-endemic | 26       | Annual                   | 0 | –    | –  | As above                                                   | As above                           | Elimination of transmission | Not conducted; recommended                            |
| <b>Eastern African region</b>                 |           |                              |                                  |               |          |                          |   |      |    |                                                            |                                    |                             |                                                       |
| Tekle et al., 2016 <sup>57</sup>              | 2013      | Ethiopia                     | North Gondar                     | Hyper-endemic | 10       | Annual                   | 0 | <80% | –  | <i>S. damnosum</i> s.l.                                    | No                                 | Close to elimination        | –                                                     |
| Tekle et al., 2016 <sup>57</sup>              | 2011      | Ethiopia                     | Kafa, Shekka & Bench Maji        | Hyper-endemic | 10       | Annual                   | 0 | <80% | –  | <i>S. damnosum</i> s.l.                                    | No                                 | Ongoing transmission        | –                                                     |
| Gebrezgabiher et al., 2020 <sup>13</sup>      | 2017–2018 | Ethiopia                     | Yeki                             | Hyper-endemic | 15       | Biannual                 | 7 | ≥80% | 6  | –                                                          | No                                 | Close to elimination        | –                                                     |
| Katarbwa et al., 2020a <sup>29</sup>          | 2014–2017 | Ethiopia                     | Metema                           | Hyper-endemic | 14       | Annual, biannual in 2016 | 1 | ≥80% | 14 | <i>S. damnosum</i> s.l.                                    | No                                 | Elimination of transmission | –                                                     |
| Tekle et al., 2016 <sup>57</sup>              | 2012      | Malawi                       | Malawi extension & Thyolo Muanza | Meso-endemic  | 12<br>13 | Annual                   | 0 | <80% | –  | <i>S. damnosum</i> s.l.                                    | No                                 | Close to elimination        | –                                                     |
| Higazi et al., 2013 <sup>17</sup>             | 2011      | Sudan                        | Abu Hamed                        | Meso-endemic  | 13       | Biannual                 | 5 | ≥80% | 2  | <i>S. damnosum</i> s.l.                                    | No                                 | Elimination of transmission | Yes, in 2014–2015. Zarroug et al., 2016 <sup>39</sup> |



|                                        |                  |          |                                         |                        |       |                                                              |   |              |    |                                              |                 |                             |                                                           |
|----------------------------------------|------------------|----------|-----------------------------------------|------------------------|-------|--------------------------------------------------------------|---|--------------|----|----------------------------------------------|-----------------|-----------------------------|-----------------------------------------------------------|
| Katarbarwa et al., 2020a <sup>29</sup> | 2014–2017        | Sudan    | Galabat                                 | Hyper-endemic          | 10    | Annual, biannual from 2011–2014                              | 3 | ≥80%         | 14 | <i>S. damnosum</i> s.l.                      | No              | Elimination of transmission | –                                                         |
| Mweya et al., 2007 <sup>40</sup>       | 2004             | Tanzania | Tukuyu                                  | Hyper-endemic          | 10    | Annual                                                       | 0 | –            | –  | <i>S. damnosum</i> s.l.                      | No              | Close to elimination        | –                                                         |
| Tekle et al., 2016 <sup>57</sup>       | 2012             | Tanzania | Tanga & Tukuyu                          | Meso- to hyper-endemic | 11–12 | Annual                                                       | 0 | <80%         | –  | <i>S. damnosum</i> s.l.                      | No              | Close to elimination        | –                                                         |
| Tekle et al., 2016 <sup>57</sup>       | 2009, 2011, 2012 | Tanzania | Kilosa, Mahenge & Ruvuma                | Meso-endemic           | 10–12 | Annual                                                       | 0 | <80%         | –  | <i>S. damnosum</i> s.l.                      | No              | Ongoing transmission        | –                                                         |
| Tekle et al., 2016 <sup>57</sup>       | 2013             | Tanzania | Tunduru                                 | Hyper-endemic          | 18    | Annual                                                       | 0 | <80%         | –  | <i>S. damnosum</i> s.l.                      | No              | Close to elimination        | –                                                         |
| Paulin et al., 2017 <sup>47</sup>      | 2015             | Tanzania | Tukuyu                                  | Hypo- to hyper-endemic | 15    | Annual                                                       | 0 | <80%         | –  | <i>S. damnosum</i> s.l.                      | Yes, 3 years    | Ongoing transmission        | –                                                         |
| Hendy et al., 2018 <sup>14</sup>       | 2015–2016        | Tanzania | Mahenge                                 | Hyper-endemic          | 19    | Annual                                                       | 0 | <80%         | –  | <i>Simulium neavei</i>                       | No              | Ongoing transmission        | –                                                         |
| Mshana et al., 2023 <sup>64</sup>      | 2022             | Tanzania | Ulanga (Morogoro)                       | Hyper-endemic          | 20    | Biannual                                                     | 3 | ≥80%         | –  | <i>S. damnosum</i> s.l.                      | No              | Ongoing transmission        | –                                                         |
| Bhwana et al., 2023 <sup>69</sup>      | 2021             | Tanzania | Mahenge: Mdingo, Msogezi, Mzelezi, Sali | Hyper- to holo-endemic | 24    | Biannual                                                     | 2 | <80%<br>≥80% | 1  | <i>S. damnosum</i> s.l.,<br><i>S. neavei</i> | No              | Ongoing transmission        | –                                                         |
| Katarbarwa et al., 2008 <sup>22</sup>  | 2005             | Uganda   | Kasese, Kisoro, Mbale, Moyo, Nebbi      | Hyper-endemic          | 13    | Annual                                                       | 0 | ≥80%         | –  | –                                            | No              | Ongoing transmission        | –                                                         |
| Katarbarwa et al., 2012 <sup>24</sup>  | 2010             | Uganda   | Wadelai                                 | Meso-endemic           | 18    | Annual from 1993–2005, biannual from 2006–2010 <sup>65</sup> | 5 | ≥80%         | 15 | <i>Simulium neavei</i>                       | No, disappeared | Elimination of transmission | Not conducted; later reported for 2017–2020 <sup>65</sup> |
| Katarbarwa et al., 2013b <sup>26</sup> | 2010–2011        | Uganda   | Nyagak-Bondo                            | Hyper-endemic          | 15–19 | Annual from 1993–2011, biannual from 2012 <sup>65</sup>      | 7 | ≥80%         | 12 | <i>Simulium neavei</i>                       | No              | Ongoing transmission        | –                                                         |
| Katarbarwa et al., 2014 <sup>27</sup>  | 2007–2011        | Uganda   | Mount Elgon                             | Hyper-endemic          | 18    | Annual from 1994–2006, biannual                              | 5 | ≥80%         | 4  | <i>Simulium neavei</i>                       | Yes, 1.25 years | Elimination of transmission | Not conducted; later reported for                         |

|                                         |           |        |                     |                       |    |                                                              |   |      |    |                         |                             |                             |                                                                                |
|-----------------------------------------|-----------|--------|---------------------|-----------------------|----|--------------------------------------------------------------|---|------|----|-------------------------|-----------------------------|-----------------------------|--------------------------------------------------------------------------------|
|                                         |           |        |                     |                       |    | from 2007–2011 <sup>65</sup>                                 |   |      |    |                         |                             |                             | 2012–2015 <sup>65</sup>                                                        |
| Katarwa et al., 2016 <sup>28</sup>      | 2012–2015 | Uganda | Imaramagambo        | Hypo- to meso-endemic | 22 | Annual from 1991–2012 <sup>65</sup>                          | 0 | <80% | –  | <i>Simulium neavei</i>  | No, disappeared             | Elimination of transmission | Yes; reported for 2013–2016 <sup>65</sup>                                      |
| Lakwo et al., 2013 <sup>34</sup>        | 2010      | Uganda | Itwara              | Hyper-endemic         | 21 | Annual from 1991–2011 <sup>65</sup>                          | 0 | ≥80% | 17 | <i>Simulium neavei</i>  | Yes, 1 year, elimination    | Elimination of transmission | Not conducted; recommended; later reported for 2012–2015 <sup>65</sup>         |
| Lakwo et al., 2015 <sup>35</sup>        | 2012      | Uganda | Mpamba-Nkusi        | Holo-endemic          | 18 | Annual from 1995–2008, biannual from 2009–2012 <sup>65</sup> | 4 | ≥80% | 18 | <i>Simulium neavei</i>  | Yes, 2–7 years, elimination | Elimination of transmission | Not conducted; recommended; later reported for 2013–2016 <sup>65</sup>         |
| Lakwo et al., 2017 <sup>36</sup>        | 2013      | Uganda | Kashoya-Kitomi      | Hyper-endemic         | 23 | Annual from 1991–2006, biannual from 2007–2013 <sup>65</sup> | 7 |      | 12 | <i>Simulium neavei</i>  | Yes, 3–5 years, elimination | Elimination of transmission | Not conducted; recommended; later reported for 2014–2017 <sup>65</sup>         |
| Lakwo Luroni et al., 2017 <sup>37</sup> | 2014      | Uganda | Obongi              | Hyper-endemic         | 21 | Annual from 1993–2014 <sup>65</sup>                          | 0 | ≥80% | 12 | <i>S. damnosum</i> s.l. | No, disappeared             | Elimination of transmission | Not conducted; recommended with LF; later reported for 2016–2019 <sup>65</sup> |
| Katarwa et al., 2020b <sup>30</sup>     | 2014–2017 | Uganda | Wambabya-Rwamarongo | –                     | 23 | Annual from 1991–2006, biannual from 2007–2013 <sup>65</sup> | 7 | ≥80% | 9  | <i>Simulium neavei</i>  | Yes, 3 years, elimination   | Elimination of transmission | Yes; reported for 2014–2017 <sup>65</sup>                                      |
| Tekle et al., 2016 <sup>57</sup>        | 2012      | Uganda | Kasese              | Hyper-endemic         | 14 | Annual                                                       | 0 | <80% | –  | <i>S. damnosum</i> s.l. | No                          | Close to elimination        | –                                                                              |

|                                     |              |        |                                |                   |          |        |   |      |   |                         |    |                         |   |
|-------------------------------------|--------------|--------|--------------------------------|-------------------|----------|--------|---|------|---|-------------------------|----|-------------------------|---|
| Tekle et al.,<br>2016 <sup>57</sup> | 2009<br>2012 | Uganda | Adjumani Mojo<br>& Arua Nebbie | Hyper-<br>endemic | 10<br>13 | Annual | 0 | <80% | – | <i>S. damnosum</i> s.l. | No | Ongoing<br>transmission | – |
|-------------------------------------|--------------|--------|--------------------------------|-------------------|----------|--------|---|------|---|-------------------------|----|-------------------------|---|

§ For papers that had reported coverage of total population, this value was converted into coverage of eligible population by multiplying it by 1.23 (80/65), as treating 80% of the eligible population is approximately equivalent to treating 65% of the total population.

PTS: Post-treatment surveillance; SIZ: Special Intervention Zone; s.l.: sensu lato.

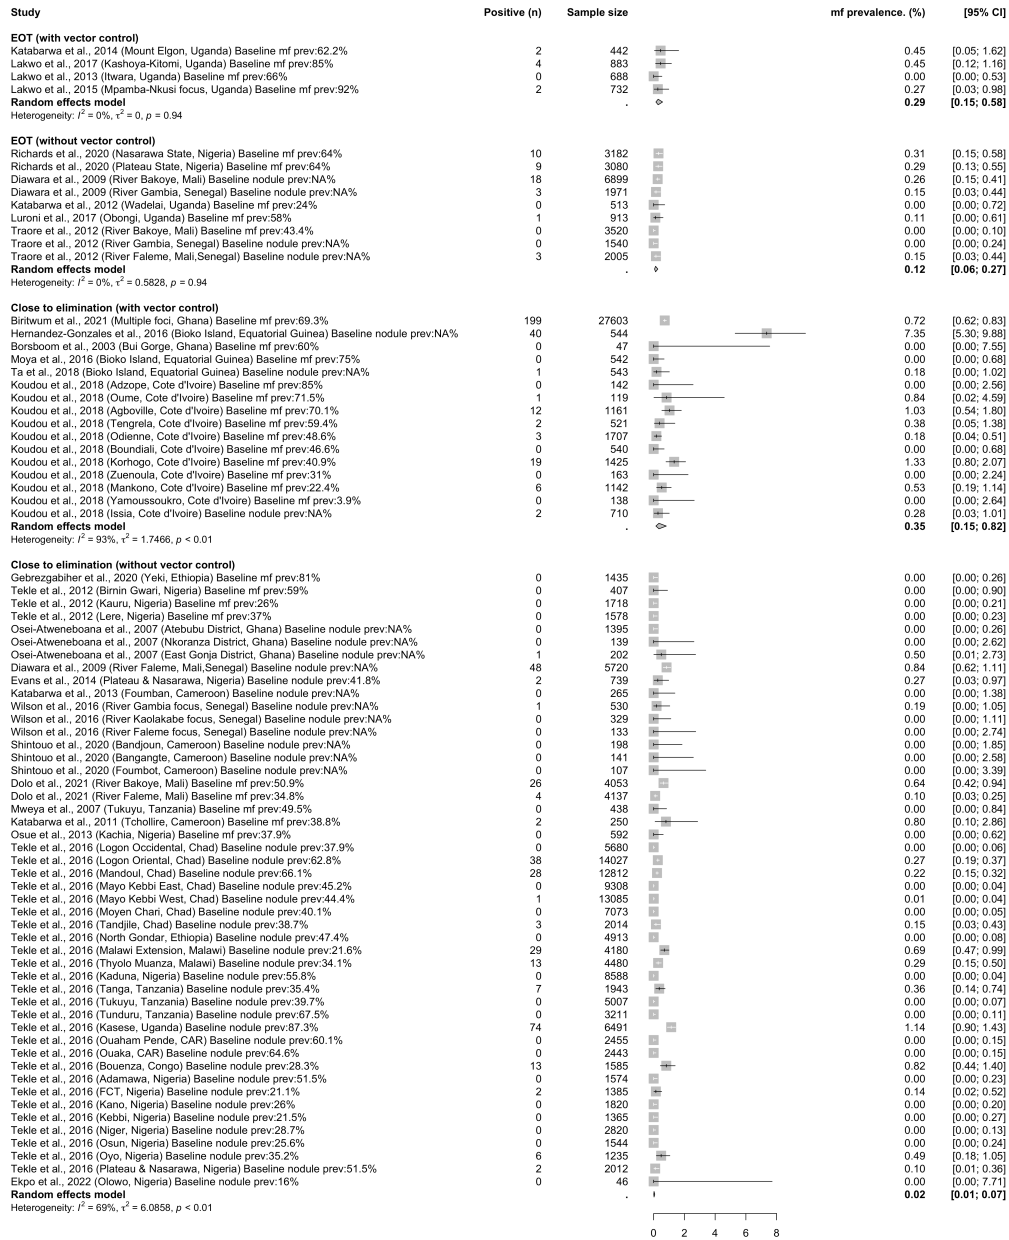

**Figure S3: Forest plots of microfilarial (mf) prevalence reported by studies conducting parasitological evaluations to measure the impact of interventions for records classified as reporting elimination of transmission (EOT) or being close to EOT with or without vector control.** Records reporting EOT had achieved proposed serological/entomological thresholds,<sup>11,19</sup> and those classified as close to elimination had mf prevalence <1% at the time of the evaluations, but had not conducted sero- or xenomonitoring, or had not met proposed thresholds. Some records appear in both groups (e.g. Plateau and Nasarawa in Nigeria) depending on the time the evaluations took place. The references used are described in page 10. The grey boxes denote the effect sizes of studies and the horizontal lines are the 95% CIs.

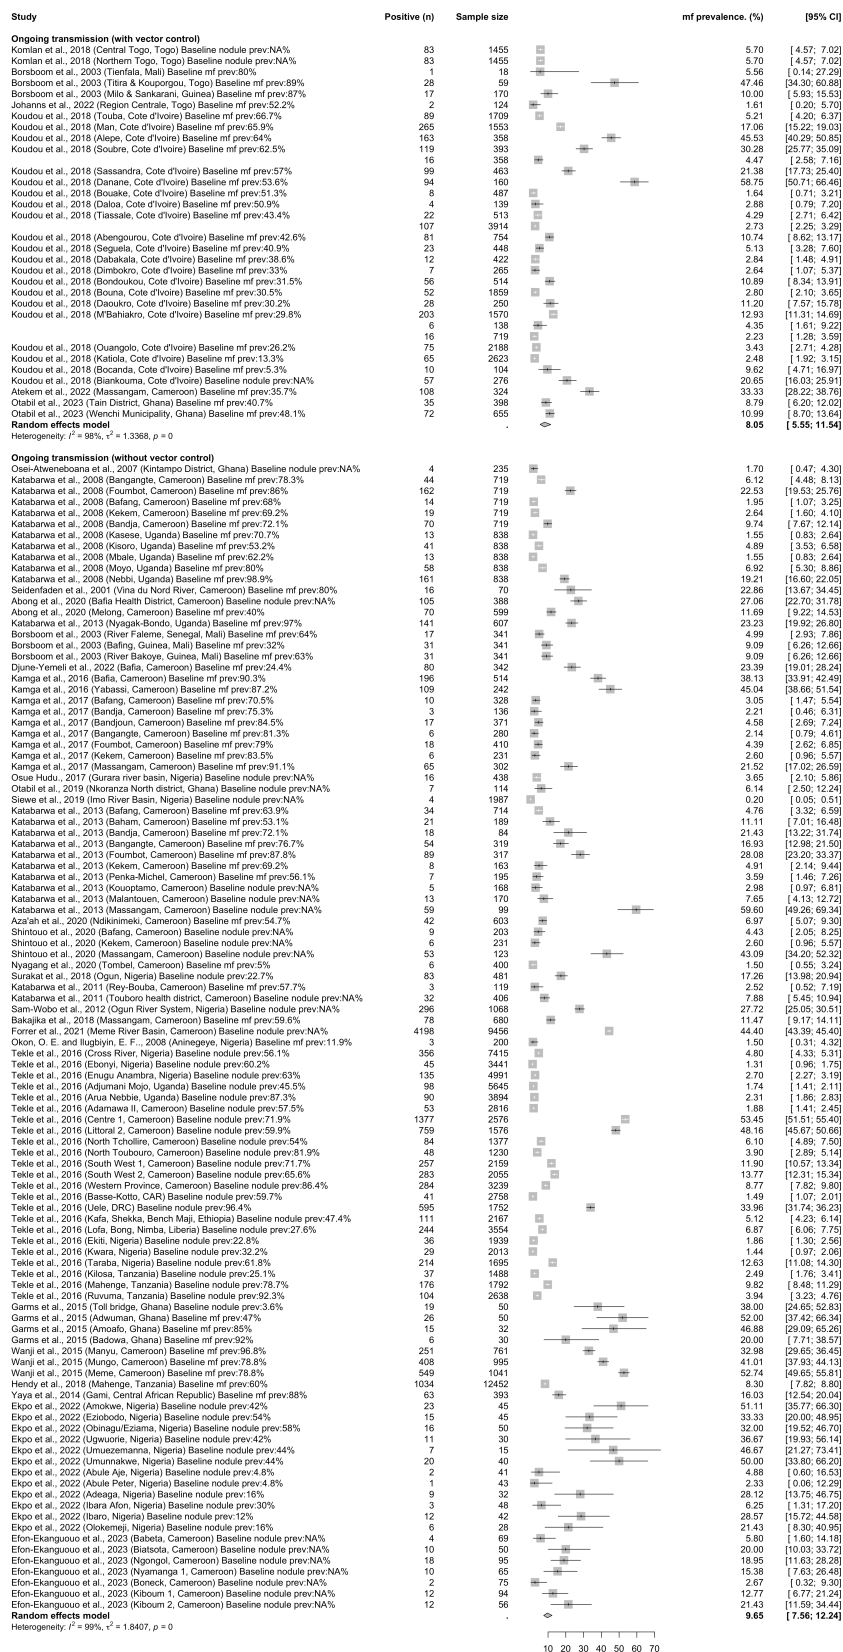

**Figure S4: Forest plots of microfilarial (mf) prevalence reported by studies conducting parasitological evaluations to measure the impact of interventions for records reporting ongoing onchocerciasis transmission, with or without vector control.** Records were classified as reporting ongoing transmission if mf prevalence  $\geq 1\%$  at the time of the evaluations. The references used are described in page 10. The grey boxes denote the effect sizes of studies and the horizontal lines are the 95% CIs.

### Additional multivariable analysis

We conducted an additional (Poisson) meta-regression analysis on the association between microfilarial prevalence (number of skin-snip positive individuals out of total examined) at the time epidemiological evaluations were conducted after the intervention period being reported in the records providing parasitological results and the following variables: African region where the records originated from (West, Central, or East Africa) as per United Nations classification;<sup>76</sup> ecological features (savannah, forest, forest-savannah mosaic); larviciding of vector breeding sites (yes or no and duration); number of years of ivermectin treatment (<14 or  $\geq 14$  years); proportion of systematic non-adherence ( $\leq 5\%$  as used in epidemiological models,<sup>77,78</sup> or  $>5\%$ ); years of continuous therapeutic coverage at  $\geq 80\%$  of eligible population (<10 or  $\geq 10$  years); baseline endemicity (i) hypoendemicity, ii) mesoendemicity, iii) hyperendemicity, and iv) holoendemicity as defined in the main text), and co-endemicity (not reported, with loiasis and/or with lymphatic filariasis). The results below present the log-risk ratios for the variables included in the final model, with the method of model selection as described in the main text.

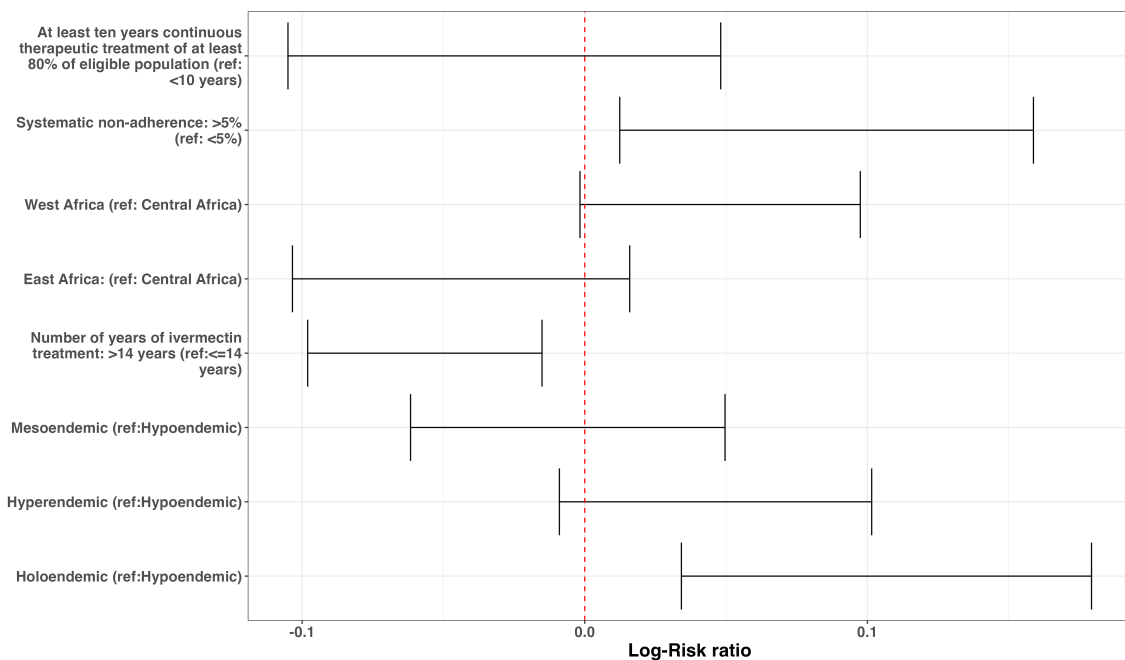

**Figure S5:** Multivariate analysis of the factors associated with mf prevalence at the time epidemiological evaluations were conducted following the intervention period.

In foci that had received at least 14 years of ivermectin treatment, the risk of high mf prevalence was significantly lower (log-risk ratio:  $-0.06$  [95%CI =  $-0.10$ –  $-0.02$ ]) than in those with  $<14$  years. Foci reporting systematic non-compliance  $>5\%$  had a significantly higher risk of reporting high mf prevalence (log-risk ratio  $0.09$  [95%CI =  $0.01$ – $0.16$ ]), compared to those with  $<5\%$ . Taking hypoendemicity at baseline (pre-intervention) as the reference group, records that reported holoendemicity at baseline had significantly increased risk of presenting mf prevalence at the time of the epidemiological evaluation following the intervention period (log-risk ratio:  $0.11$  [95%CI =  $0.03$ – $0.18$ ]).

### Supplementary References

- 1 Abong RA, Amambo GN, Chounna Ndongmo PW, et al. Differential susceptibility of *Onchocerca volvulus* microfilaria to ivermectin in two areas of contrasting history of mass drug administration in Cameroon: relevance of microscopy and molecular techniques for the monitoring of skin microfilarial repopulation within six months of direct observed treatment. *BMC Infect Dis* 2020; **20**: 726.
- 2 Anosike JC, Dozie INS, Ameh GI, Ukaga CN, Nwoke BE, Nzechukwu CT, Udujih OS, Nwosu DC. The varied beneficial effects of ivermectin (Mectizan) treatment, as observed within onchocerciasis foci in south-eastern Nigeria. *Ann Trop Med Parasitol* 2007; **101**: 593–600.
- 3 Aza'ah RA, Sumo L, Ntonifor NH, Bopda J, Bamou RH, Nana-Djeunga HC. Point prevalence mapping reveals hotspot for onchocerciasis transmission in the Ndikinimeki Health District, Centre Region, Cameroon. *Parasit Vectors* 2020; **13**: 519.
- 4 Bakajika D, Senyonjo L, Enyong P, et al. On-going transmission of human onchocerciasis in the Massangam health district in the West Region of Cameroon: better understanding transmission dynamics to inform changes in programmatic interventions. *PLoS Negl Trop Dis* 2018; **12**: e0006904.
- 5 Biritwum NK, de Souza DK, Asiedu O, Marfo B, Amazigo UV, Gyapong JO. Onchocerciasis control in Ghana (1974–2016). *Parasit Vectors* 2021; **14**: 3.
- 6 Borsboom GJ, Boatin BA, Nagelkerke NJ, Agoua H, Akpoboua KL, Alley EW, Bissan Y, Renz A, Yameogo L, Remme JH, Habbema JD. Impact of ivermectin on onchocerciasis transmission: assessing the empirical evidence that repeated ivermectin mass treatments may lead to elimination/eradication in West-Africa. *Filaria J* 2003; **2**: 8.
- 7 Diawara L, Traoré MO, Badji A, Bissan Y, Doumbia K, et al. Feasibility of onchocerciasis elimination with ivermectin treatment in endemic foci in Africa: first evidence from studies in Mali and Senegal. *PLoS Negl Trop Dis* 2009; **3**: e479.
- 8 Djune-Yemeli L, Domché A, Nana-Djeunga HC, Donfo-Azafack C, Lenou-Nanga CG et al. Relationship between skin snip and Ov16 ELISA: two diagnostic tools for onchocerciasis in a focus in Cameroon after two decades of ivermectin-based preventive chemotherapy. *PLoS Negl Trop Dis* 2022; **16**: e0010380.
- 9 Dolo H, Coulibaly YI, Sow M, et al. Serological Evaluation of onchocerciasis and lymphatic filariasis elimination in the Bakoye and Falémé foci, Mali. *Clin Infect Dis* 2021; **72**: 1585–93.

- 10 Evans DS, Alphonsus K, Umaru J, et al. Status of onchocerciasis transmission after more than a decade of mass drug administration for onchocerciasis and lymphatic filariasis elimination in central Nigeria: challenges in coordinating the stop MDA decision. *PLoS Negl Trop Dis* 2014; **8**: e3113.
- 11 Forrer A, Wanji S, Obie ED, et al. Why onchocerciasis transmission persists after 15 annual ivermectin mass drug administrations in South-West Cameroon. *BMJ Glob Health* 2021; **6**: e003248.
- 12 Garms R, Badu K, Owusu-Dabo E, et al. Assessments of the transmission of *Onchocerca volvulus* by *Simulium sanctipauli* in the Upper Denkyira District, Ghana, and the intermittent disappearance of the vector. *Parasitol Res* 2015; **114**: 1129–37.
- 13 Gebrezgabiher G, Mekonnen Z, Yewhalaw D, Hailu A. Status of parasitological indicators and morbidity burden of onchocerciasis after years of successive implementation of mass distribution of ivermectin in selected communities of Yeki and Asosa districts, Ethiopia. *BMC Public Health* 2020; **20**: 1233.
- 14 HENDY A, KRÜGER A, PFARR K, et al. The blackfly vectors and transmission of *Onchocerca volvulus* in Mahenge, south eastern Tanzania. *Acta Trop* 2018; **181**: 50–9.
- 15 Hernández-González A, Moya L, Perteguer MJ, et al. Evaluation of onchocerciasis seroprevalence in Bioko Island (Equatorial Guinea) after years of disease control programmes. *Parasit Vectors* 2016; **9**: 509.
- 16 Herrador Z, Garcia B, Ncogo P, et al. Interruption of onchocerciasis transmission in Bioko Island: Accelerating the movement from control to elimination in Equatorial Guinea. *PLoS Negl Trop Dis* 2018; **12**: e0006471.
- 17 Higazi TB, Zarroug IMA, Mohamed HA, et al. Interruption of *Onchocerca volvulus* transmission in the Abu Hamed focus, Sudan. *Am J Trop Med Hyg* 2013; **89**: 51–7.
- 18 Johanns SI, Gantin RG, Wangala B, et al. *Onchocerca volvulus*-specific antibody and cellular responses in onchocerciasis patients treated annually with ivermectin for 30 years and exposed to parasite transmission in central Togo. *PLoS Negl Trop Dis* 2022; **16**: e0010340.
- 19 Kamba GR, Dissak-Delon FN, Nana-Djeunga HC, et al. Still mesoendemic onchocerciasis in two Cameroonian community-directed treatment with ivermectin projects despite more than 15 years of mass treatment. *Parasit Vectors* 2016; **9**: 581.
- 20 Kamba GR, Dissak-Delon FN, Nana-Djeunga HC, et al. Important progress towards elimination of onchocerciasis in the West Region of Cameroon. *Parasit Vectors* 2017; **10**: 373.
- 21 Kamba GR, Dissak-Delon FN, Nana-Djeunga HC, et al. Audit of the community-directed treatment with ivermectin (CDTI) for onchocerciasis and factors associated with adherence in three regions of Cameroon. *Parasit Vectors* 2018; **11**: 356.
- 22 Katararwa M, Eyamba A, Habomugisha P, et al. After a decade of annual dose mass ivermectin treatment in Cameroon and Uganda, onchocerciasis transmission continues. *Trop Med Int Health* 2008; **13**: 1196–203.
- 23 Katararwa MN, Eyamba A, Nwane P, et al. Seventeen years of annual distribution of ivermectin has not interrupted onchocerciasis transmission in North Region, Cameroon. *Am J Trop Med Hyg* 2011; **85**: 1041–9.
- 24 Katararwa MN, Walsh F, Habomugisha P, et al. Transmission of onchocerciasis in Wadelai focus of northwestern Uganda has been interrupted and the disease eliminated. *J Parasitol Res* 2012; **2012**: 748540.
- 25 Katararwa MN, Eyamba A, Nwane P, et al. Fifteen years of annual mass treatment of onchocerciasis with ivermectin have not interrupted transmission in the West region of Cameroon. *J Parasitol Res* 2013a; **2013**: 420928.



- 26 Katarwa MN, Lakwo T, Habomugisha P, et al. Transmission of *Onchocerca volvulus* continues in Nyagak-Bondo focus of northwestern Uganda after 18 years of a single dose of annual treatment with ivermectin. *Am J Trop Med Hyg* 2013b; **89**: 293–300.
- 27 Katarwa M, Lakwo T, Habomugisha P, et al. Transmission of *Onchocerca volvulus* by *Simulium neavei* in Mount Elgon focus of eastern Uganda has been interrupted. *Am J Trop Med Hyg* 2014; **90**: 1159–66.
- 28 Katarwa MN, Katamanywa J, Lakwo T, et al. The Imaramagambo onchocerciasis focus in southwestern Uganda: interruption of transmission after disappearance of the vector *Simulium neavei* and its associated freshwater crabs. *Am J Trop Med Hyg* 2016; **95**: 417–25.
- 29 Katarwa MN, Zarroug IMA, Negussu N, et al. The Galabat-Metema cross-border onchocerciasis focus: the first coordinated interruption of onchocerciasis transmission in Africa. *PLoS Negl Trop Dis* 2020a; **14**: e0007830.
- 30 Katarwa MN, Habomugisha P, Khainza A, et al. Elimination of *Simulium neavei*-transmitted onchocerciasis in Wambabya-Rwamarongo focus of western Uganda. *Am J Trop Med Hyg* 2020b; **103**: 1135–42.
- 31 Kogi E, Bulus W. The impact of ivermectin mass treatment on the prevalence of onchocerciasis by rapid epidemiological assessment in Galadimawa, Kaduna State, Nigeria. *Sci World J* 2008; **3**: 1–5.
- 32 Komlan K, Vossberg PS, Gantin RG, et al. *Onchocerca volvulus* infection and serological prevalence, ocular onchocerciasis and parasite transmission in northern and central Togo after decades of *Simulium damnosum* s.l. vector control and mass drug administration of ivermectin. *PLoS Negl Trop Dis* 2018; **12**: e0006312.
- 33 Koudou BG, Kouakou MM, Ouattara AF, et al. Update on the current status of onchocerciasis in Côte d’Ivoire following 40 years of intervention: progress and challenges. *PLoS Negl Trop Dis* 2018; **12**: e0006897.
- 34 Lakwo TL, Garms R, Rubaale T, et al. The disappearance of onchocerciasis from the Itwara focus, western Uganda after elimination of the vector *Simulium neavei* and 19 years of annual ivermectin treatments. *Acta Trop* 2013; **126**: 218–21.
- 35 Lakwo TL, Garms R, Tukahebwa E, et al. Successful interruption of the transmission of *Onchocerca volvulus* in Mpamba-Nkusi focus, Kibaale District, Uganda. *East Afr Med J* 2015; **92**: 401–7.
- 36 Lakwo T, Garms R, Wamani J, et al. Interruption of the transmission of *Onchocerca volvulus* in the Kashoya-Kitomi focus, western Uganda by long-term ivermectin treatment and elimination of the vector *Simulium neavei* by larviciding. *Acta Trop* 2017; **167**: 128–36.
- 37 Lakwo Luroni T, Gabriel M, Tukahebwa E, et al. The interruption of *Onchocerca volvulus* and *Wuchereria bancrofti* transmission by integrated chemotherapy in the Obongi focus, North Western Uganda. *PLoS One* 2017; **12**: e0189306.
- 38 Lamberton PHL, Cheke RA, Winskill P, et al. Onchocerciasis transmission in Ghana: persistence under different control strategies and the role of the simuliid vectors. *PLoS Negl Trop Dis* 2015; **9**: e0003688.
- 39 Moya L, Herrador Z, Ta-Tang TH, et al. Evidence for suppression of onchocerciasis transmission in Bioko Island, Equatorial Guinea. *PLoS Negl Trop Dis* 2016; **10**: e0004829.
- 40 Mweya CN, Kalinga AK, Kabula B, Malley KD, Ruhiso MH, Maegga BT. Onchocerciasis situation in the Tukuyu focus of southwest Tanzania after ten years of ivermectin mass treatment. *Tanzan Health Res Bull* 2007; **9**: 174–9.
- 41 Nyagang SM, Cumber SN, Cho JF, Keka EI, Nkfusai CN, Wepngong E, Tsoka-Gwegweni JM, Fokam EB. Prevalence of onchocerciasis, attitudes and practices and the treatment coverage after

- 15 years of mass drug administration with ivermectin in the Tombel health district, Cameroon. *Pan Afr Med J* 2020; **35**: 107.
- 42 Okon OE, Ilugbiyin EF. Evaluation of Mectizan efficacy in the treatment of onchocerciasis using microfilarial load in a community in south-eastern Nigeria. *Int J Biomed Hlth Sci* 2008; **4**: 1994–6.
- 43 Osei-Atweneboana MY, Eng JK, Boakye DA, Gyapong JO, Prichard RK. Prevalence and intensity of *Onchocerca volvulus* infection and efficacy of ivermectin in endemic communities in Ghana: a two-phase epidemiological study. *Lancet* 2007; **369**: 2021–9.
- 44 Osue HO, Inabo HI, Yakubu SE, et al. Impact of eighteen-year varied compliance to onchocerciasis treatment with ivermectin in sentinel savannah agrarian communities in Kaduna State of Nigeria. *ISRN Parasitol* 2013; **2013**: 960168.
- 45 Osue HO. Field-based evidence of single and few doses of annual ivermectin treatment efficacy in eliminating skin microfilaria load after a decade of intervention. *Ethiop J Health Sci* 2017; **27**: 129–38.
- 46 Otabil KB, Gyasi SF, Awuah E, et al. Prevalence of onchocerciasis and associated clinical manifestations in selected hypoendemic communities in Ghana following long-term administration of ivermectin. *BMC Infect Dis* 2019; **19**: 431.
- 47 Paulin HN, Nshala A, Kalinga A, Mwingira U, Wiegand R, Cama V, Cantey PT. Evaluation of onchocerciasis transmission in Tanzania: preliminary rapid field results in the Tukuyu Focus, 2015. *Am J Trop Med Hyg* 2017; **97**: 673–6.
- 48 Richards FO, Eigege A, Umaru J, et al. The interruption of transmission of human onchocerciasis by an annual mass drug administration program in Plateau and Nasarawa States, Nigeria. *Am J Trop Med Hyg* 2020; **102**: 582–92.
- 49 Sam-Wobo SO, Adeleke MA, Jayeola OA, et al. Epidemiological evaluation of onchocerciasis along Ogun river system, Southwest Nigeria. *J Vector Borne Dis* 2012; **49**: 101–4.
- 50 Seidenfaden R, Fischer A, Bonow I, Ekale D, Tanya V, Renz A. Combined benefits of annual mass treatment with ivermectin and cattle zooprophylaxis on the severity of human onchocerciasis in northern Cameroon. *Trop Med Int Health* 2001; **6**: 715–25.
- 51 Shintouo CM, Nguve JE, Asa FB, et al. Entomological assessment of *Onchocerca* species transmission by black flies in selected communities in the West Region of Cameroon. *Pathogens* 2020; **9**: 722.
- 52 Siewe Fodjo JN, Ukaga CN, Nwazor EO, et al. Low prevalence of epilepsy and onchocerciasis after more than 20 years of ivermectin treatment in the Imo River Basin in Nigeria. *Infect Dis Poverty* 2019; **8**: 8.
- 53 Sufi DA, Zainab T. Evaluation of onchocerciasis: A decade of post treatment with ivermectin in Zainabi and Ririwai Doguwa local government area of Kano State. *Adv Entomol* 2015; **3**: 1–5.
- 54 Surakat OA, Sam-Wobo SO, De Los Santos T, et al. Seroprevalence of onchocerciasis in Ogun State, Nigeria after ten years of mass drug administration with ivermectin. *Southern Afr J Infect Dis* 2018; **33**: 65–71.
- 55 Ta T-H, Moya L, Nguema J, et al. Geographical distribution and species identification of human filariasis and onchocerciasis in Bioko Island, Equatorial Guinea. *Acta Trop* 2018; **180**: 12–7.
- 56 Tekle AH, Elhassan E, Isiyaku S, et al. Impact of long-term treatment of onchocerciasis with ivermectin in Kaduna State, Nigeria: first evidence of the potential for elimination in the operational area of the African Programme for Onchocerciasis Control. *Parasit Vectors* 2012; **5**: 28.

- 57 Tekle AH, Zouré HGM, Noma M, Boussinesq M, Coffeng LE, Stolk WA, Remme JH. Progress towards onchocerciasis elimination in the participating countries of the African Programme for onchocerciasis control: epidemiological evaluation results. *Infect Dis Poverty* 2016; **5**: 66.
- 58 Traoré S, Wilson MD, Sima A, et al. The elimination of the onchocerciasis vector from the island of Bioko as a result of larviciding by the WHO African Programme for Onchocerciasis Control. *Acta Trop* 2009; **111**: 211–8.
- 59 Traore MO, Sarr MD, Badji A, et al. Proof-of-principle of onchocerciasis elimination with ivermectin treatment in endemic foci in Africa: final results of a study in Mali and Senegal. *PLoS Negl Trop Dis* 2012; **6**: e1825.
- 60 Wanji S, Kengne-Ouafo JA, Esum ME, et al. Situation analysis of parasitological and entomological indices of onchocerciasis transmission in three drainage basins of the rain forest of South West Cameroon after a decade of ivermectin treatment. *Parasit Vectors* 2015; **8**: 202.
- 61 Wilson NO, Badara Ly A, Cama VA, et al. Evaluation of lymphatic filariasis and onchocerciasis in three Senegalese districts treated for onchocerciasis with ivermectin. *PLoS Negl Trop Dis* 2016; **10**: e0005198.
- 62 Yaya G, Kobangué L, Kémata B, Gallé D, Grésengué G. Élimination ou contrôle de l'onchocercose en Afrique ? Cas du village de Gami en République Centrafricaine. *Bull Soc Pathol Exot* 2014; **107**: 188–93.
- 63 Zarroug IM, Hashim K, ElMubark WA, et al. The first confirmed elimination of an onchocerciasis focus in Africa: Abu Hamed, Sudan. *Am J Trop Med Hyg* 2016; **95**: 1037–40.
- 64 Mshana MI, Silvestri V, Mushi V, Bonaventura WM, Tarimo D, et al. Burden and factors associated with onchocerciasis transmission among school-aged children after more than 20 years of Community Directed Treatment with Ivermectin in Ulanga district, Tanzania: a school-based cross-sectional study. *PLoS Glob Public Health* 2023; **3**: e0001919.
- 65 Atekem K, Dixon R, Wilhelm A, Biholong B, Oye J, et al. Evaluating the impact of alternative intervention strategies in accelerating onchocerciasis elimination in an area of persistent transmission in the West Region of Cameroon. *PLoS Negl Trop Dis* 2022; **16**: e0010591.
- 66 Otabil KB, Ankrah B, Bart-Plange EJ, et al. Prevalence of epilepsy in the onchocerciasis endemic middle belt of Ghana after 27 years of mass drug administration with ivermectin. *Infect Dis Poverty* 2023; **12**: 75.
- 67 Chikezie, F.M., Opara, K.N., Ubulom, P.M.E. et al. Onchocerciasis transmission status in some endemic communities of Cross River State, Nigeria after two decades of mass drug administration with ivermectin. *Sci Rep* 2023; **13**: 5413.
- 68 Ekpo, U.F., Eneanya, O.A., Nwankwo, E.N. et al. Persistence of onchocerciasis in villages in Enugu and Ogun states in Nigeria following many rounds of mass distribution of ivermectin. *BMC Infect Dis* 2022; **22**: 832.
- 69 Bhwana D, Amaral LJ, Mhina A, Hayuma PM, Francis F, et al. Impact of a bi-annual community-directed treatment with ivermectin programme on the incidence of epilepsy in an onchocerciasis-endemic area of Mahenge, Tanzania: a population-based prospective study. *PLoS Negl Trop Dis* 2023; **17**: e0011178.
- 70 Efon-Ekangouo A, Nana-Djeunga HC, Nzune-Toche N, Dongmo-Yemele R, Bopda J, et al. Impact of short-term discontinuation of ivermectin-based chemoprevention on onchocerciasis transmission in endemic settings with long history of mass drug administration. *PLoS Negl Trop Dis* 2023; **17**: e0011250.
- 71 Miri ES, Eigege A, Kahansim B, et al. Two Nigerian States (Plateau and Nasarawa) have eliminated transmission of human onchocerciasis: a report of post-ivermectin mass drug administration surveillance. *Am J Trop Med Hyg*. 2022;**108** :37–40.

- 72 Anagbogu, I.N., Saka, Y.A., Surakat, O. et al. Integrated transmission assessment surveys (iTAS) of lymphatic filariasis and onchocerciasis in Cross River, Taraba and Yobe States, Nigeria. *Parasit Vectors* 2022; **15**: 201.
- 73 Ekanya, R., Obie, E.D., Hamill, L. et al. The preparatory phase for ground larviciding implementation for onchocerciasis control in the Meme River Basin in South West Cameroon: the COUNTDOWN Consortium alternative strategy implementation trial. *Parasit Vectors* 2022; **15**: 219.
- 74 Domche A, Nwane PB, Nana Djeunga HC, et al. Status of *Onchocerca volvulus* (Spirurida: Onchocercidae) transmission and effect of climatic variables on the vector population dynamics after two decades of ivermectin-based preventive chemotherapy in the Mbam Valley (Centre Region, Cameroon). *J Med Entomol.* 2022;**59**: 2130–38.
- 75 Isiyaku S, Igbe M, Madaki S, et al. The interruption of transmission of onchocerciasis in Kaduna, Kebbi and Zamfara states, Nigeria: another milestone achievement. *Int Health.* 2022;**14 (Suppl 2)**: ii43–ii54.
- 76 Stolk WA, Walker M, Coffeng LE, Basáñez MG, De Vlas SJ. Required duration of mass ivermectin treatment for onchocerciasis elimination in Africa: a comparative modelling analysis. *Parasit Vectors* 2015; **8**: 552.
- 77 United Nations Department of Economic and Social Affairs. World Population Prospects 2019 Volume I: Comprehensive Tables. 2019. [https://population.un.org/wpp/Publications/Files/WPP2019\\_Volume-I\\_Comprehensive-Tables.pdf](https://population.un.org/wpp/Publications/Files/WPP2019_Volume-I_Comprehensive-Tables.pdf).
- 78 Cano J, Basáñez MG, O'Hanlon SJ, Tekle AH, Wanji S, Zouré HG, Rebollo MP, Pullan RL. Identifying co-endemic areas for major filarial infections in sub-Saharan Africa: seeking synergies and preventing severe adverse events during mass drug administration campaigns. *Parasit Vectors* 2018; **11**: 70.
