# Supplementary material for: Elimination of transmission of onchocerciasis (river blindness) with long-term ivermectin mass drug administration with or without vector control in sub-Saharan Africa: a systematic review and meta-analysis
Source: Lancet Glob Health. 2024 Mar 11;12(5):e771–82. doi: 10.1016/S2214-109X(24)00043-3 (PMC11009120; doi:10.1016/S2214-109X(24)00043-3)
Supplement: Spanish translation of the abstract [file mmc3.pdf]

# THE LANCET

## Global Health

### Supplementary appendix 3

This translation in Spanish was submitted by the authors and we reproduce it as supplied. It has not been peer reviewed. *The Lancet's* editorial processes have only been applied to the original in English, which should serve as reference for this manuscript.

Los autores nos proporcionaron esta traducción al español y la reproducimos tal como nos fue entregada. No la hemos revisado. Los procesos editoriales de *The Lancet* se han aplicado únicamente al original en inglés, que debe servir de referencia para este manuscrito.

Supplement to: Nyamai Mutono N, Basáñez M-G, James A, et al. Elimination of transmission of onchocerciasis (river blindness) with long-term ivermectin mass drug administration with or without vector control in sub-Saharan Africa: a systematic review and meta-analysis. *Lancet Glob Health* 2024; published online March 11. [https://doi.org/10.1016/S2214-109X\(24\)00043-3](https://doi.org/10.1016/S2214-109X(24)00043-3).

## Resumen

**Antecedentes.** La Organización Mundial de la Salud (OMS) ha propuesto metas para la eliminación de la transmisión de la oncocercosis (ceguera de los ríos) para el año 2030. Al menos el 99% de los casos de la enfermedad se encuentran en África sub-sahariana. Las principales medidas de intervención se han basado en el control de vectores y la administración masiva de ivermectina por muchos años, con éxito variable. Nuestro objetivo es el de identificar factores asociados con la eliminación de la transmisión de la oncocercosis en África sub-sahariana.

**Métodos.** Para esta revisión sistemática y meta-análisis se realizó una búsqueda de artículos publicados que han reportado resultados de evaluaciones epidemiológicas y entomológicas sobre el estado de la transmisión de la oncocercosis en África sub-sahariana, con o sin control vectorial. Las bases de datos utilizadas fueron las de MEDLINE, PubMed, Web de la Ciencia, Embase, Registro Cochrane Central de Ensayos Controlados, Index Medicus Africano y Google Académico, desde la inceptión de las mismas hasta el 19 de agosto del 2023, sin restricción de idiomas. Los términos utilizados fueron “oncocercosis” E “ivermectina” Y “administración masiva de medicamentos”. Los tres criterios de inclusión fueron (1) foco o focos de oncocercosis localizados en África; (2) reportando eliminación o al menos 10 años de administración masiva de ivermectina, y (3) inclusión de al menos uno de los siguientes resultados: prevalencia de microfilarias, prevalencia de nódulos oncocercóticos, seroprevalencia de anticuerpos contra el antígeno Ov16, y prevalencia de infectividad en los simúlidos vectores. Estudios de modelaje matemático y de revisión fueron excluidos. Cuatro revisores (NM, AJ, AM, y TNK) obtuvieron los datos en duplicado del texto completo de los artículos utilizando un instrumento de extracción desarrollado en Excel, con columnas describiendo los datos de interés a ser extraídos y una columna adicional a fin de resaltar comentarios importantes para cada estudio. No se solicitaron datos individuales a los autores de los estudios. Los focos identificados fueron clasificados como: aquellos alcanzando la eliminación de la transmisión, aquellos que están cercanos a la eliminación, y aquellos en los cuales la transmisión aún continúa. Modelos de meta-regresión con efectos mixtos fueron utilizados a fin de identificar factores asociados con la situación de la transmisión. El estudio fue registrado en PROSPERO, CRD42022338986.

**Hallazgos.** De los 1525 artículos tamizados luego de la remoción de duplicados, 75 proporcionaron 282 registros provenientes de 238 focos distintos en 19 (70%) de los 27 países actualmente endémicos en África sub-sahariana. Veinticuatro (9%) de los registros reportaron eliminación de la transmisión, 86 (30%) reportaron estar cercanos a la eliminación, y 172 (61%) que la transmisión continúa. El valor de  $I^2$  fue del 83.3% (IC 95% 79.7 a 86.3). El reportar al menos 10 años continuos de administración masiva de ivermectina con un mínimo de cobertura terapéutica del 80% de población elegible resultó en logaritmos de la razón de probabilidades significativamente más altos de alcanzar la eliminación de la transmisión (8.5 [IC 95% 3.5 a 13.5]) o eliminación de la transmisión y estar cerca de la eliminación de la transmisión (42.4 [18.7 a 66.1]) que el no haber reportado dichas condiciones. La administración masiva de ivermectina por 15–19 años (22.7 [17.2 a 28.2]), y el tratamiento bianual (43.3 [27.2 a 59.3]) demostraron una asociación positiva con la eliminación de la transmisión y estar cerca de la eliminación en comparación con duraciones de tratamiento por debajo de 15 años o sin administración bianual, respectivamente. El haber implementado medidas anti-vectoriales (–42.8 [–59.1 a –26.5]) o haber tenido niveles holoendémicos basales (–41.97 [–60.6 a –23.2]) estuvieron asociados con un mayor riesgo de presentar transmisión continua en comparación con no haber tenido control de vectores o con niveles basales de hipoendemicidad, respectivamente. La desaparición de los simúlidos debido al control vectorial o al cambio ambiental contribuyó a la eliminación de la transmisión.

**Interpretación.** La duración, frecuencia y cobertura de la administración masiva de ivermectina, así como los niveles basales de endemidad y la eliminación o desaparición de los vectores constituyen importantes determinantes de la eliminación de la transmisión de la oncocercosis en África subsahariana. Estos hallazgos resaltan la importancia de mejorar y sostener altas coberturas terapéuticas e incrementar la frecuencia de tratamiento a fin de que los países endémicos puedan alcanzar la eliminación de la transmisión de la oncocercosis.

**Financiamiento.** La Fundación Bill & Melinda Gates, el Consorcio de Modelaje de las Enfermedades Tropicales Desatendidas, y el Consejo de Investigaciones Médicas del Reino Unido en empresa conjunta con el proyecto de Salud Global del EDCTP3.
